# Supplementary material for: Adsorption properties of M-UiO-66 (M = Zr(iv); Hf(iv) or Ce(iv)) with BDC or PDC linker
Source: Royal Society of Chemistry journal article supplement (doi:10.1039/d4dt00941j), 2024-01-01
Supplement: d4dt00941j1.pdf [file d4dt00941j1.pdf]

## Supplementary Information (ESI)

### Adsorption properties of M-UiO-66 (M = Zr (IV); Hf (IV) or Ce (IV)) with BDC or PDC linker

Diego González<sup>a</sup>, Cesar Pazo-Carballo<sup>a,b,d\*</sup>, Esteban Camú<sup>c,d</sup>, Yoan Hidalgo-Rosa<sup>d,e</sup>, Ximena Zarate<sup>d,e</sup>, Néstor Escalona<sup>b,c,d</sup>, Eduardo Schott<sup>a,d\*</sup>

<sup>a</sup> Departamento de Química Inorgánica, Facultad de Química y Farmacia, Centro de Energía UC, Pontificia Universidad Católica de Chile, Avenida Vicuña Mackenna 4860, Santiago, Chile

<sup>b</sup> Departamento de Química Física, Facultad de Química y Farmacia, Pontificia Universidad Católica de Chile, Avenida Vicuña Mackenna 4860, Santiago, Chile

<sup>c</sup> Departamento de Ingeniería Química y Bioprocesos, Escuela de Ingeniería, Pontificia Universidad Católica de Chile, Avenida Vicuña Mackenna 4860, Macul, Santiago, Chile.

<sup>d</sup> Millennium Nuclei on Catalytic Processes towards Sustainable Chemistry (CSC)-Chile.

<sup>e</sup> Instituto de Ciencias Químicas Aplicadas, Theoretical and Computational Chemistry Center, Facultad de Ingeniería, Universidad Autónoma de Chile, Av. Pedro de Valdivia 425, Santiago, Chile.

\*edschott@uc.cl

## Contents

|                                                                         |           |
|-------------------------------------------------------------------------|-----------|
| <b>Chemicals</b> .....                                                  | <b>1</b>  |
| <b>Synthesis Procedures</b> .....                                       | <b>1</b>  |
| <b>Characterization data</b> .....                                      | <b>3</b>  |
| <b>FT-IR spectra</b> .....                                              | <b>3</b>  |
| <b>Powder x-ray diffraction</b> .....                                   | <b>3</b>  |
| <b>N<sub>2</sub> adsorption-desorption analysis</b> .....               | <b>4</b>  |
| <b>Defect chemistry</b> .....                                           | <b>7</b>  |
| <b>Defect determination for M-UiO-66 via titration</b> .....            | <b>7</b>  |
| <b>Defect determination for M-UiO-66-PDC via TGA</b> .....              | <b>8</b>  |
| <b>CO<sub>2</sub> adsorption parameters and error range</b> .....       | <b>9</b>  |
| <b>Computational Analysis</b> .....                                     | <b>12</b> |
| <b>Kinetics of adsorption</b> .....                                     | <b>16</b> |
| <b>Kinetic Model</b> .....                                              | <b>16</b> |
| <b>Rate-limiting kinetic model</b> .....                                | <b>22</b> |
| <b>Isosteric Heat</b> .....                                             | <b>26</b> |
| <b>Q<sub>st</sub> calculated for each temperature combination</b> ..... | <b>27</b> |
| <b>References</b> .....                                                 | <b>30</b> |

## Chemicals

Ammonium cerium (IV) nitrate (98%,  $(\text{NH}_4)_2\text{Ce}(\text{NO}_3)_6$ ), 1,4-benzenedicarboxylic acid (98%,  $\text{H}_2\text{BDC}$ ), 2,5-pyridinedicarboxylic acid (98%,  $\text{H}_2\text{PDC}$ ), Zirconium(IV) chloride (99%,  $\text{ZrCl}_4$ ), Zirconyl (VI) Chloride octahydrate (98%,  $\text{ZrOCl}_2 \cdot 8\text{H}_2\text{O}$ ), (Hafnium (IV) chloride (99%,  $\text{HfCl}_4$ ), n-butylamine ( $\text{CH}_3(\text{CH}_2)_3\text{NH}_2$ ,  $\geq 99\%$ ), formic acid (96%,  $\text{CH}_2\text{O}_2$ ), and Sodium nitrate ( $\text{NaNO}_3$ , ACS reagent,  $\geq 99.0\%$ ) were purchased from Sigma-Aldrich. Acetic acid ( $\text{CH}_3\text{COOH}$ , 98.5-100.5%), Acetone ( $\text{C}_3\text{H}_6\text{O}$ , 99%), hydrochloric acid ( $\text{HCl}$ , 98%), Sodium hydroxide ( $\text{NaOH}$ , 99%), N,N'-dimethylformamide (DMF, 99 wt.%), Ethanol ( $\text{C}_2\text{H}_6\text{O}$ , 99.9%), Methanol ( $\text{CH}_3\text{OH}$ , 99.9%) was supplied by Fine Chemical Co. Ltd. and reagent alcohols were purchased from Macron Chemicals. Carbon dioxide ( $\text{CO}_2$ , 99.999%).

## Synthesis Procedures

### *Synthesis of Zr (IV) and Hf (IV) UiO-66<sup>1</sup>*

0,5 mmol of  $\text{ZrCl}_4$  (or  $\text{HfCl}_4$ ) was added on a 20 mL vial with 5 mL of DMF and 1 mL of concentrated HCl. After sonication for 10 minutes (for dissolving), 10 mL of DMF was added with 0,6 mmol of Terephthalic acid ( $\text{H}_2\text{BDC}$ ) and 10 additional minutes of sonication before being heated at  $80^\circ\text{C}$  for 12 hours. The resulting solid was separated and washed by centrifugation at 8000 rpm for 10 minutes with DMF (2x10 mL) and then with ethanol (2x10 mL). The MOF was dried under reduced pressure at room temperature for 3 days.

### *Synthesis of Ce-UiO-66<sup>2</sup>*

On a 20 mL vial, the following reactive were added: first 1,5 mmol of terephthalic acid with 7,5 mL of DMF and then 2,4 mL of  $(\text{NH}_4)_2[\text{Ce}(\text{NO}_3)_6]$  0,533 M. The vial was heated using an aluminum heater block under stirring for 30 minutes at  $100^\circ\text{C}$ . The resulting light-yellow solid was separated and washed by centrifugation at 8000 rpm for 10 minutes (sometimes 20) with DMF (3x10 mL) and then with ethanol (3x10 mL). The MOF was dried under reduced pressure at room temperature for 3 days.

### *Synthesis of Zr-UiO-66-PDC<sup>3</sup>*

4,4 mmol of 2,5-pyridinedicarboxylic acid ( $\text{H}_2\text{PDC}$ ) and 4,4 mmol of  $\text{ZrOCl}_2 \cdot 8\text{H}_2\text{O}$  were mixed in 45 mL formic acid and 5 mL water in a round bottom flask. The mixture was heated at  $120^\circ\text{C}$  under reflux for 3 hours. The reaction was quenched by placing the round bottom flask under cold water. The resulting solid was separated and washed by centrifugation at 8000 rpm for 10 minutes with water (2x10 mL) and ethanol (2x10 mL). The MOF was dried under reduced pressure at room temperature for 3 days.

### *Synthesis of Hf-UiO-66-PDC<sup>3</sup>*

5 mmol of  $\text{H}_2\text{PDC}$  and 5 mmol of  $\text{HfCl}_4$  were mixed in 25 mL of acetic acid and 25 mL of water in a round bottom flask. The mixture was heated at  $120^\circ\text{C}$  under reflux for 3 hours. The reaction was quenched by placing the round bottom flask under cold water. The resulting solid was separated and washed by centrifugation at 8000 rpm for 10 minutes with water (2x10 mL) and then with ethanol (2x10 mL). The MOF was dried under reduced pressure at room temperature for 5 days.

### Synthesis of Ce-UiO-66-PDC<sup>3</sup>

10 mmol of H<sub>2</sub>PDC and 10 mmol of (NH<sub>4</sub>)<sub>2</sub>[Ce(NO<sub>3</sub>)<sub>6</sub>] were mixed in 5 mL of concentrated HNO<sub>3</sub> and 45 mL of water in a round bottom flask. The mixture was heated at 90 °C under reflux for 30 minutes. The reaction was quenched by placing the round bottom flask under cold water. The resulting solid was separated and washed by centrifugation at 8000 rpm for 10 minutes (sometimes 20) with water (2x10 mL) and then with ethanol (2x10 mL). The MOF was dried under reduced pressure at room temperature for 3 days.

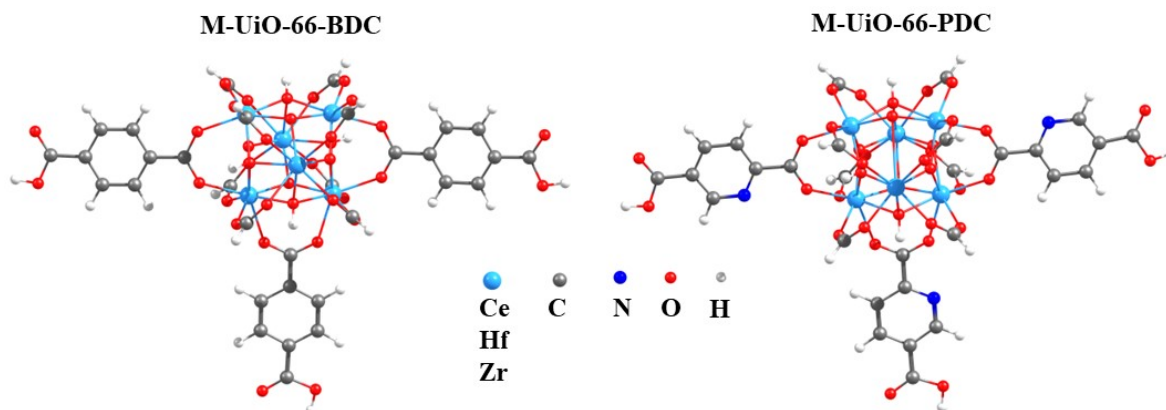

**Figure S1.** Structural Model  $M_6O_4(OH)_4(\text{Linker})_3(\text{HCOO}^-)_8$  ( $M = \text{Zr (IV), Ce (IV), and Hf (IV)}$ ; linker = BDC or PDC), representation of the M-UiO-66 truncated.

# Characterization data

FT-IR spectra

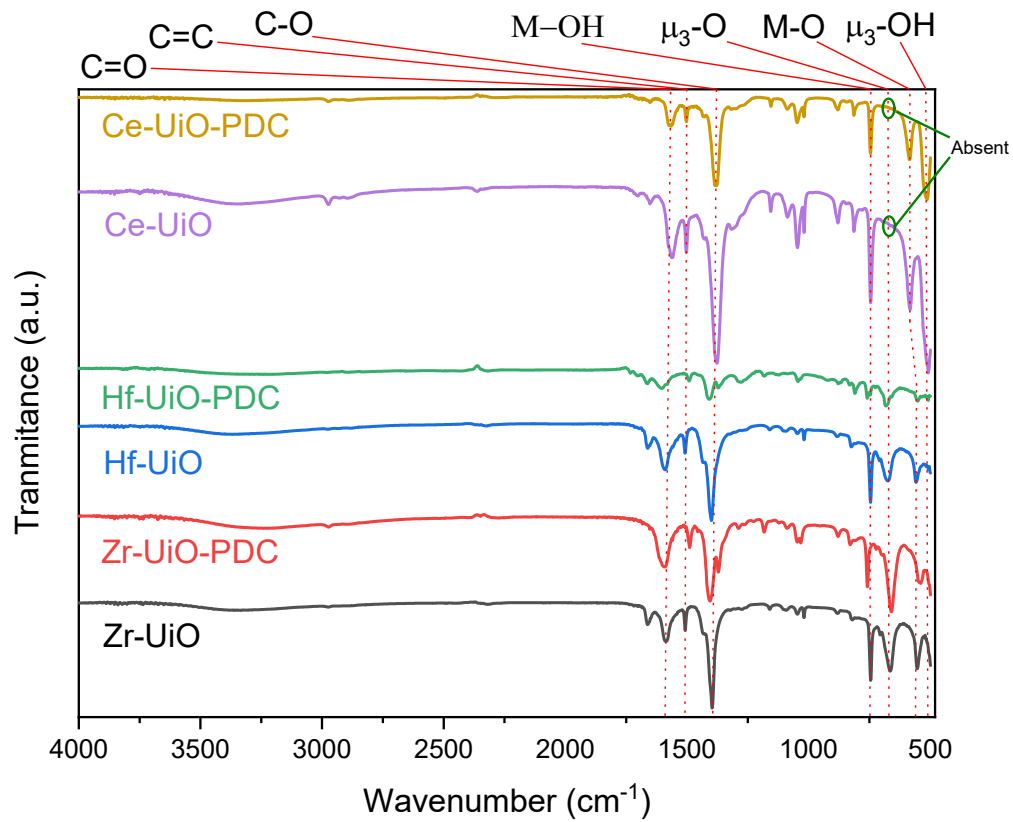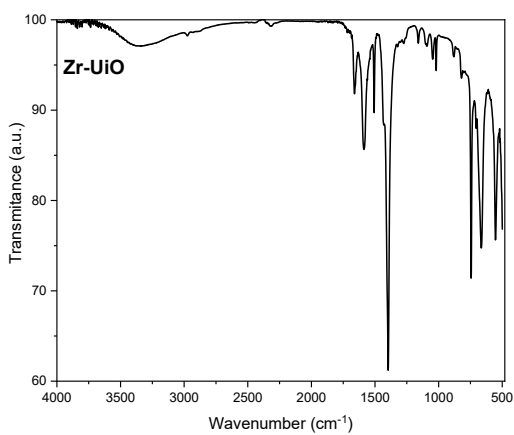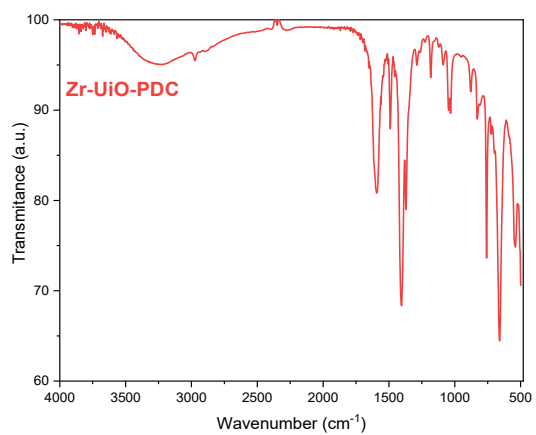

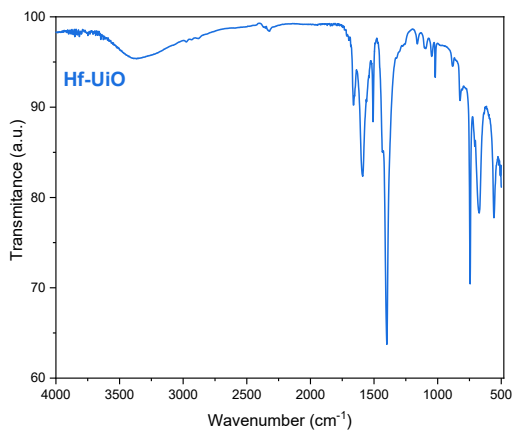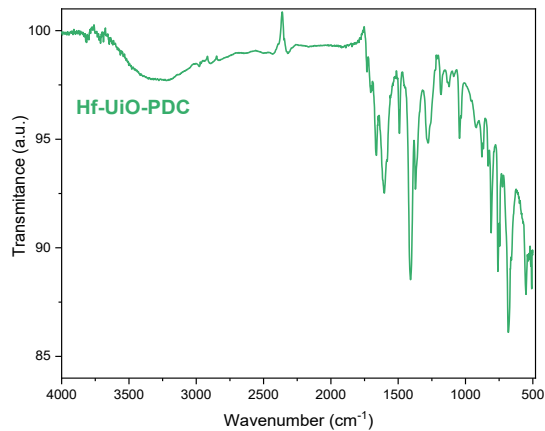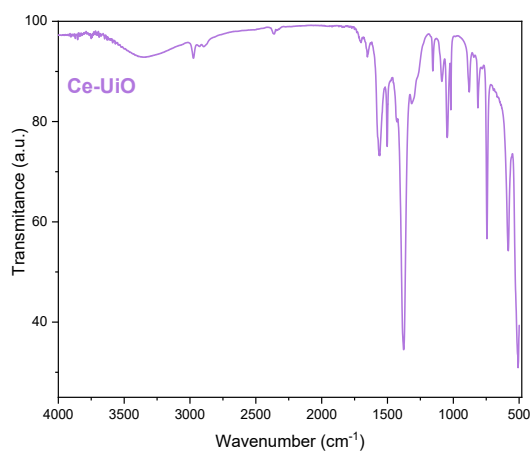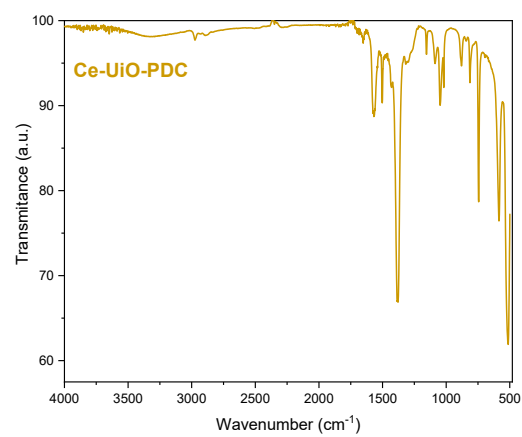

**Figure S2.** FT-IR spectra of M-UiO-66 (M = Zr (IV), Ce (IV), Hf (IV)) with BDC or PDC linker.

## Powder x-ray diffraction

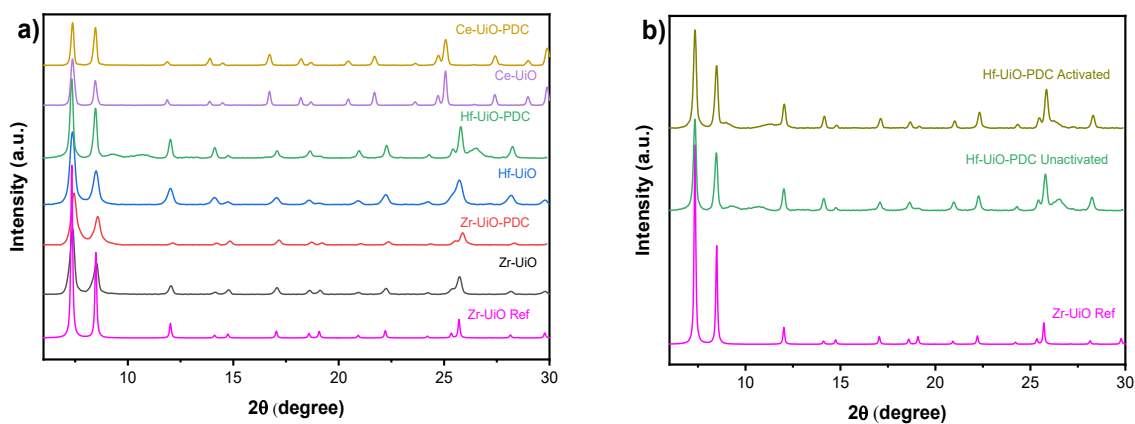

**Figure S3.** (a) PXR pattern of M-UiO-66 (M = Zr (IV), Ce (IV), Hf (IV)) with BDC or PDC linker and (b) PXR of Hf-UiO-66-PDC before and after activation process at 180°C under vacuum for 4 hours.

**Table S1.** Crystallite size and crystallinity percentage of M-UiO-66 (M = Zr (IV), Ce (IV), Hf (IV)) with BDC or PDC linker.

| Materials     | Crystallite size (nm) | Crystallinity (%) |
|---------------|-----------------------|-------------------|
| Zr-UiO-66     | 25.5                  | 99.6              |
| Zr-UiO-66-PDC | 44.8                  | 98.3              |
| Ce-UiO-66     | 40.5                  | 97.0              |
| Ce-UiO-66-PDC | 52.2                  | 95.6              |
| Hf-UiO-66     | 31.6                  | 98.3              |
| Hf-UiO-66-PDC | 52.7                  | 80.3              |

## N<sub>2</sub> adsorption-desorption analysis

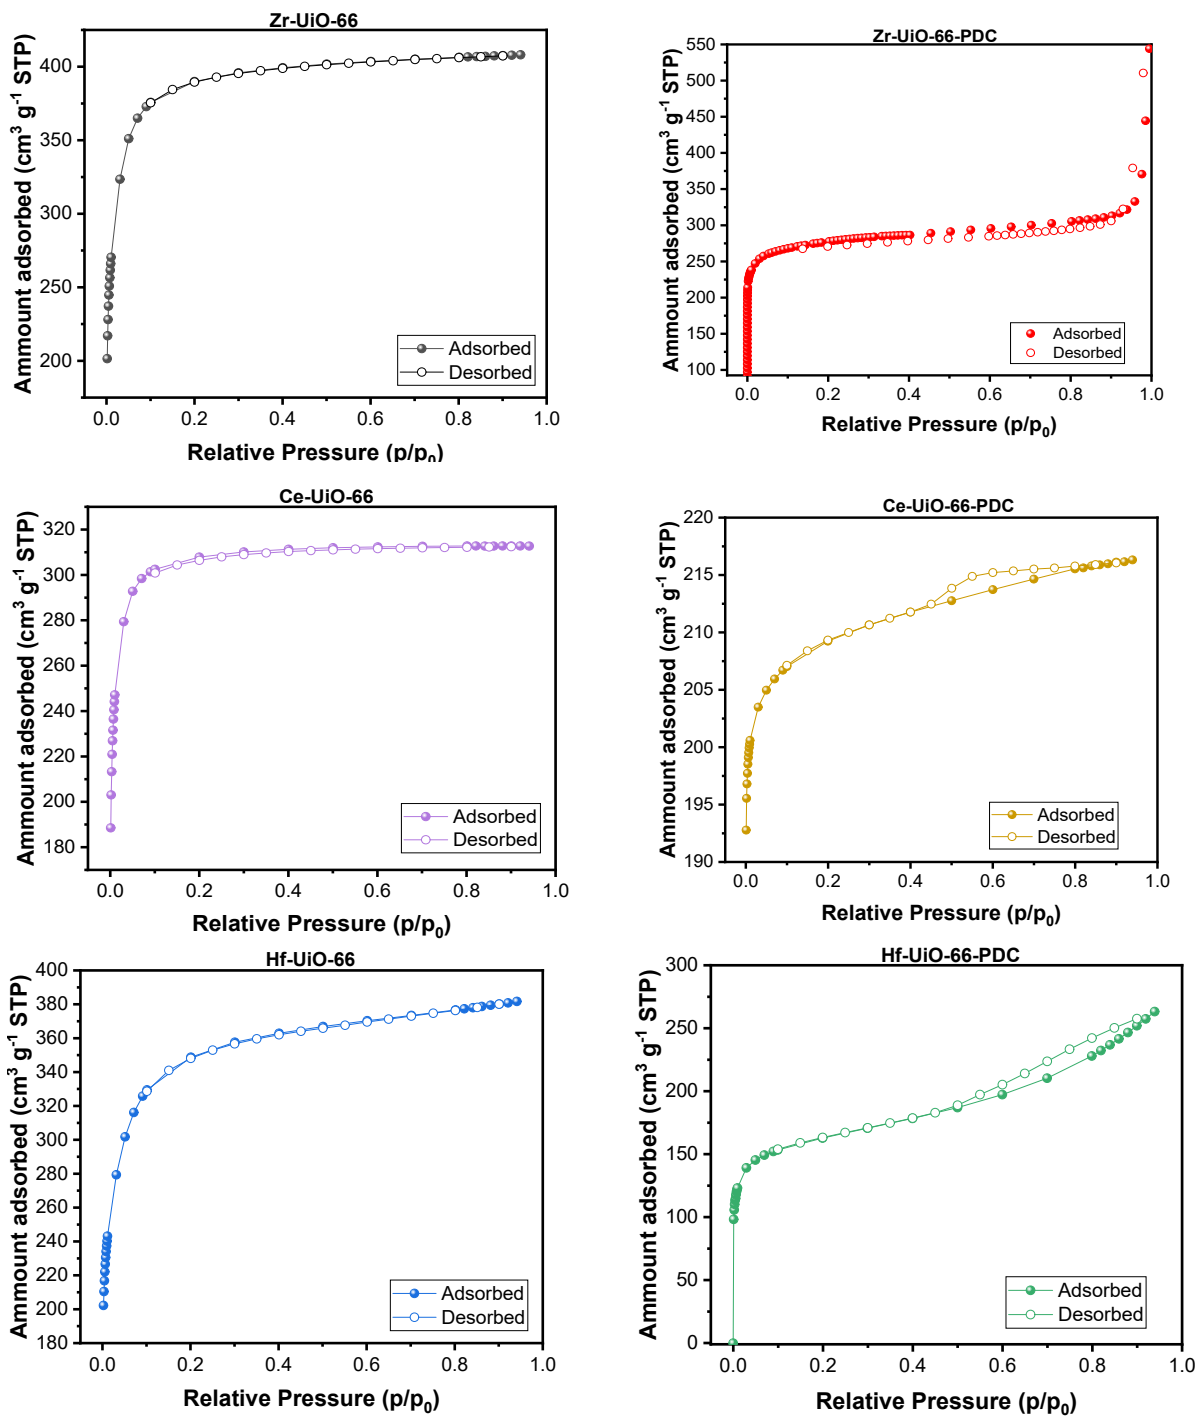

**Figure S4.** Nitrogen isotherm at 77 K of M-UiO-66 (M = Zr (IV), Ce (IV), Hf (IV)) with BDC or PDC linker.

**Table S2.** Textural properties of MOFs.

| Compound      | $S_{BET}$ [ $m^2 g^{-1}$ ] | $V_{Micro}$ [ $cm^3 g^{-1}$ ] | $V_{total}$ [ $cm^3 g^{-1}$ ] | Bibliographic $S_{BET}$ [ $m^2 g^{-1}$ ] | $V_{Meso}$ [ $cm^3 g^{-1}$ ] |
|---------------|----------------------------|-------------------------------|-------------------------------|------------------------------------------|------------------------------|
| Zr-UiO-66     | 1188                       | 0.46                          | 0.63                          | 1105 <sup>4</sup>                        | 0.17                         |
| Zr-UiO-66-PDC | 1083                       | 0.42                          | 0.51                          | 1376 <sup>3</sup>                        | 0.09                         |
| Ce-UiO-66     | 925                        | 0.42                          | 0.48                          | 1282 <sup>2</sup>                        | 0.06                         |
| Ce-UiO-66-PDC | 626                        | 0.30                          | 0.33                          | 768 <sup>3</sup>                         | 0.03                         |
| Hf-UiO-66     | 1196                       | 0.42                          | 0.59                          | 358-749 <sup>5</sup>                     | 0.17                         |
| Hf-UiO-66-PDC | 509                        | 0.16                          | 0.41                          | 383 <sup>3</sup>                         | 0.25                         |

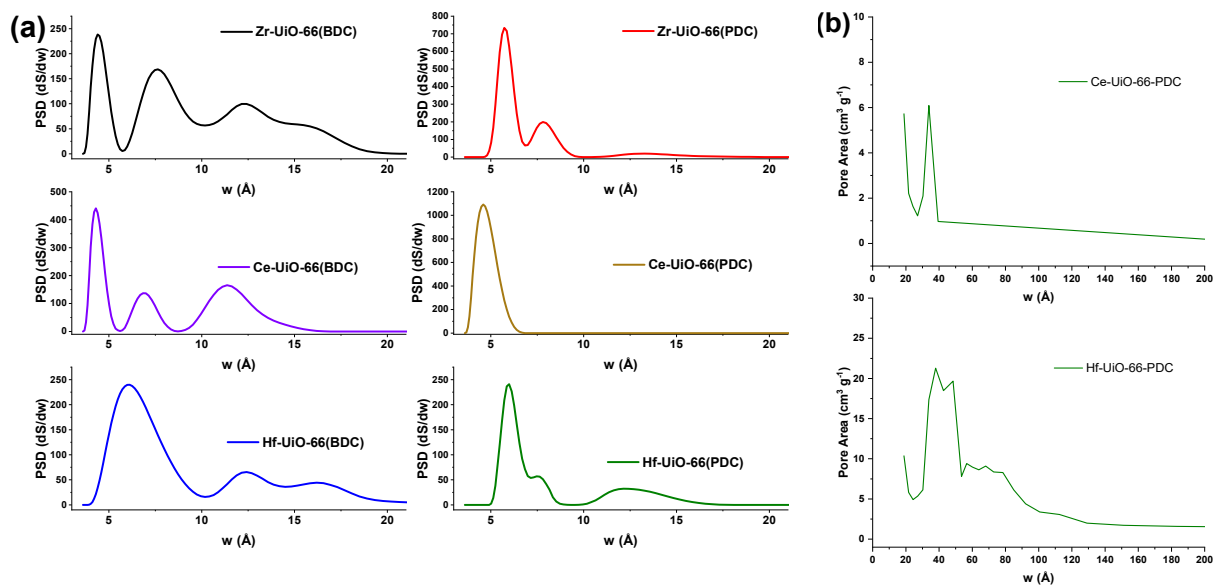**Figure S5.** (a) Pore size distribution of MOFs calculated by NLDFT and (b) mesoporous region for Hf and Ce UiO-66-PDC calculated by Barrett-Joyner-Halenda (BJH) method.



## Defect chemistry

Determination of defect concentration varies between BDC and PDC MOFs due to the hydrophobicity of M-UiO-66-PDC materials who impeded the correct measurement of *Glass* pH Electrode during potentiometric titration.

### Defect determination for M-UiO-66 via titration

Defect determination via potentiometric titration was calculated according to Klet et al.<sup>6</sup>

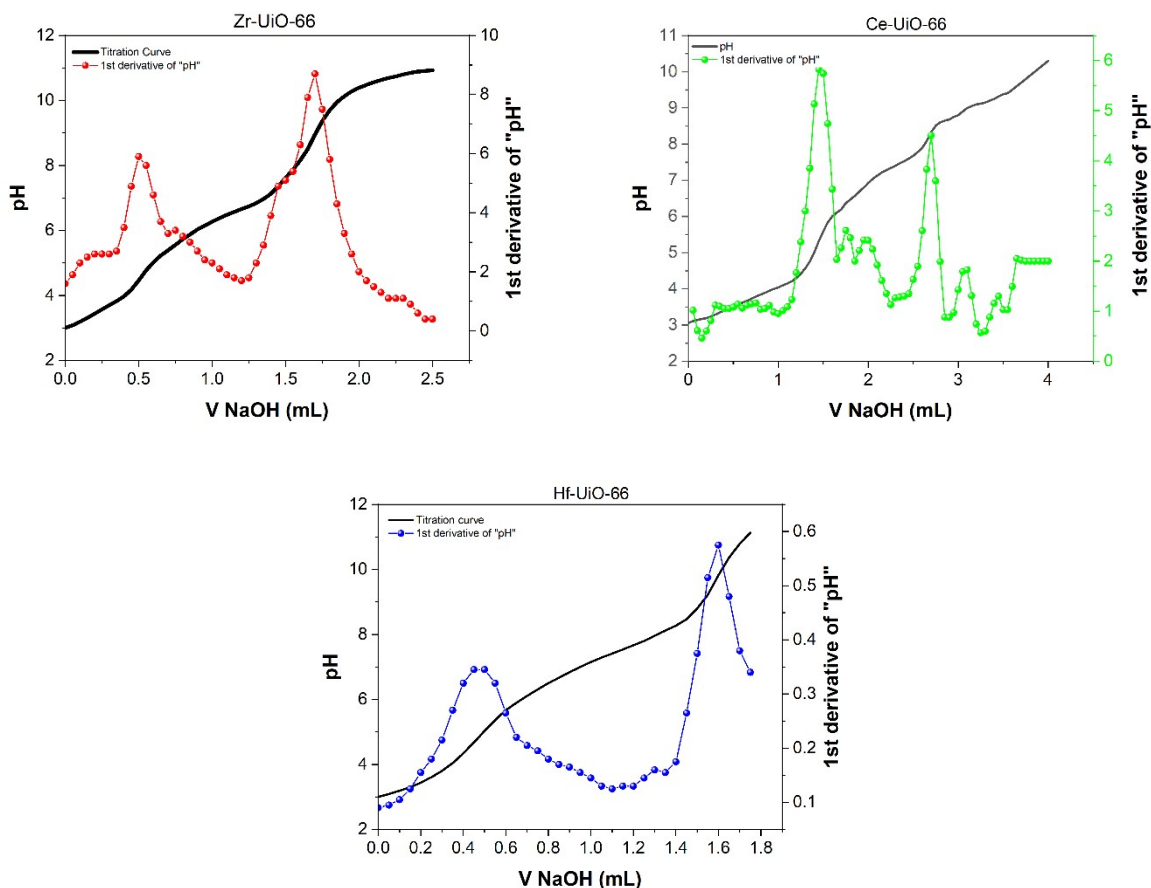

**Figure S6.** Potentiometric titrations of M-UiO-66 for defect determination.

**Table S3** Defect determination for M-UiO-66

| Material  | Missing Linker | Molecular Formula                                                                                                                                        | MW (g mol <sup>-1</sup> ) |
|-----------|----------------|----------------------------------------------------------------------------------------------------------------------------------------------------------|---------------------------|
| Zr-UiO-66 | 0,85           | Zr <sub>6</sub> O <sub>4</sub> (OH) <sub>4</sub> (C <sub>8</sub> H <sub>4</sub> O <sub>4</sub> ) <sub>5.15</sub> [(H <sub>2</sub> O)(OH)] <sub>1.7</sub> | 1583,82                   |
| Ce-UiO-66 | 1,85           | Ce <sub>6</sub> O <sub>4</sub> (OH) <sub>4</sub> (C <sub>8</sub> H <sub>4</sub> O <sub>4</sub> ) <sub>4.15</sub> [(H <sub>2</sub> O)(OH)] <sub>3.7</sub> | 1783,1                    |
| Hf-UiO-66 | 1,05           | Hf <sub>6</sub> O <sub>4</sub> (OH) <sub>4</sub> (C <sub>8</sub> H <sub>4</sub> O <sub>4</sub> ) <sub>4.95</sub> [(H <sub>2</sub> O)(OH)] <sub>2.1</sub> | 2085,4                    |

## Defect determination for M-UiO-66-PDC via TGA

Defect determination via TGA was calculated according to Lázaro.<sup>7</sup>

**Table S4** Defect determination for M-UiO-66-PDC

| Material      | Wexp.Pla | NLexp | Missing Linker | Molecular Formula                                   |
|---------------|----------|-------|----------------|-----------------------------------------------------|
| Zr-UiO-66-PDC | 186      | 4,1   | 1,9            | $Zr_6O_4(OH)_4(C_7NH_4O_4)_{4.1}[(H_2O)(OH)]_{3.8}$ |
| Ce-UiO-66-PDC | 170      | 4,7   | 1,3            | $Ce_6O_4(OH)_4(C_7NH_4O_4)_{4.7}[(H_2O)(OH)]_{2.6}$ |
| Hf-UiO-66-PDC | 167      | 5,5   | 0,5            | $Hf_6O_4(OH)_4(C_7NH_4O_4)_{5.5}[(H_2O)(OH)]_{1.0}$ |

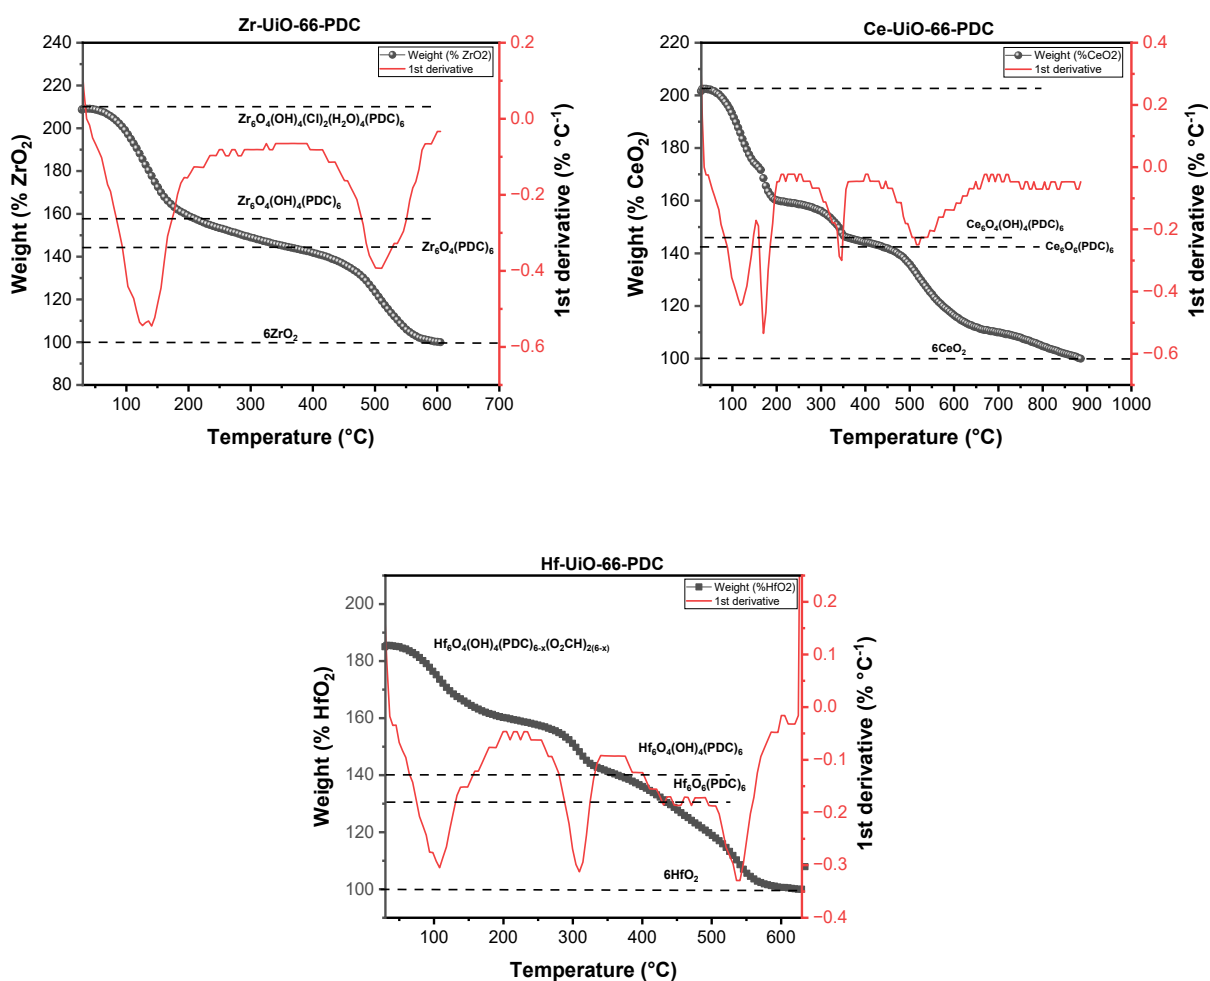

**Figure S7.** Thermogravimetric analysis of M-UiO-66-PDC for defect determination.

# CO<sub>2</sub> adsorption parameters and error range

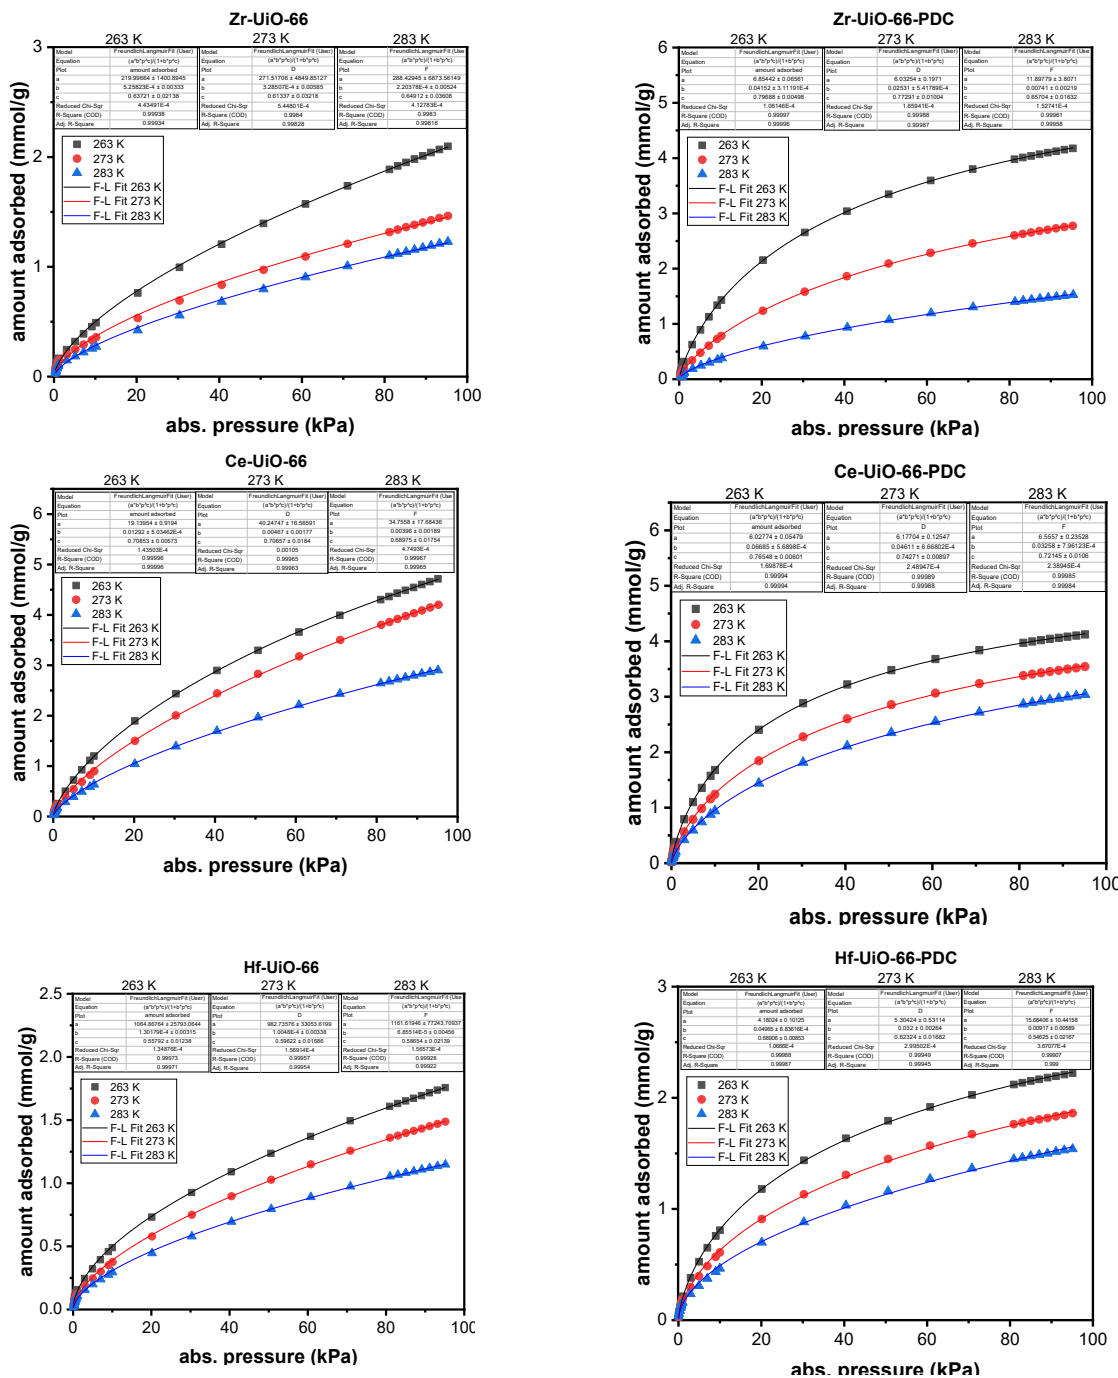

Figure S8. Freundlich-Langmuir fit parameters for each curve.

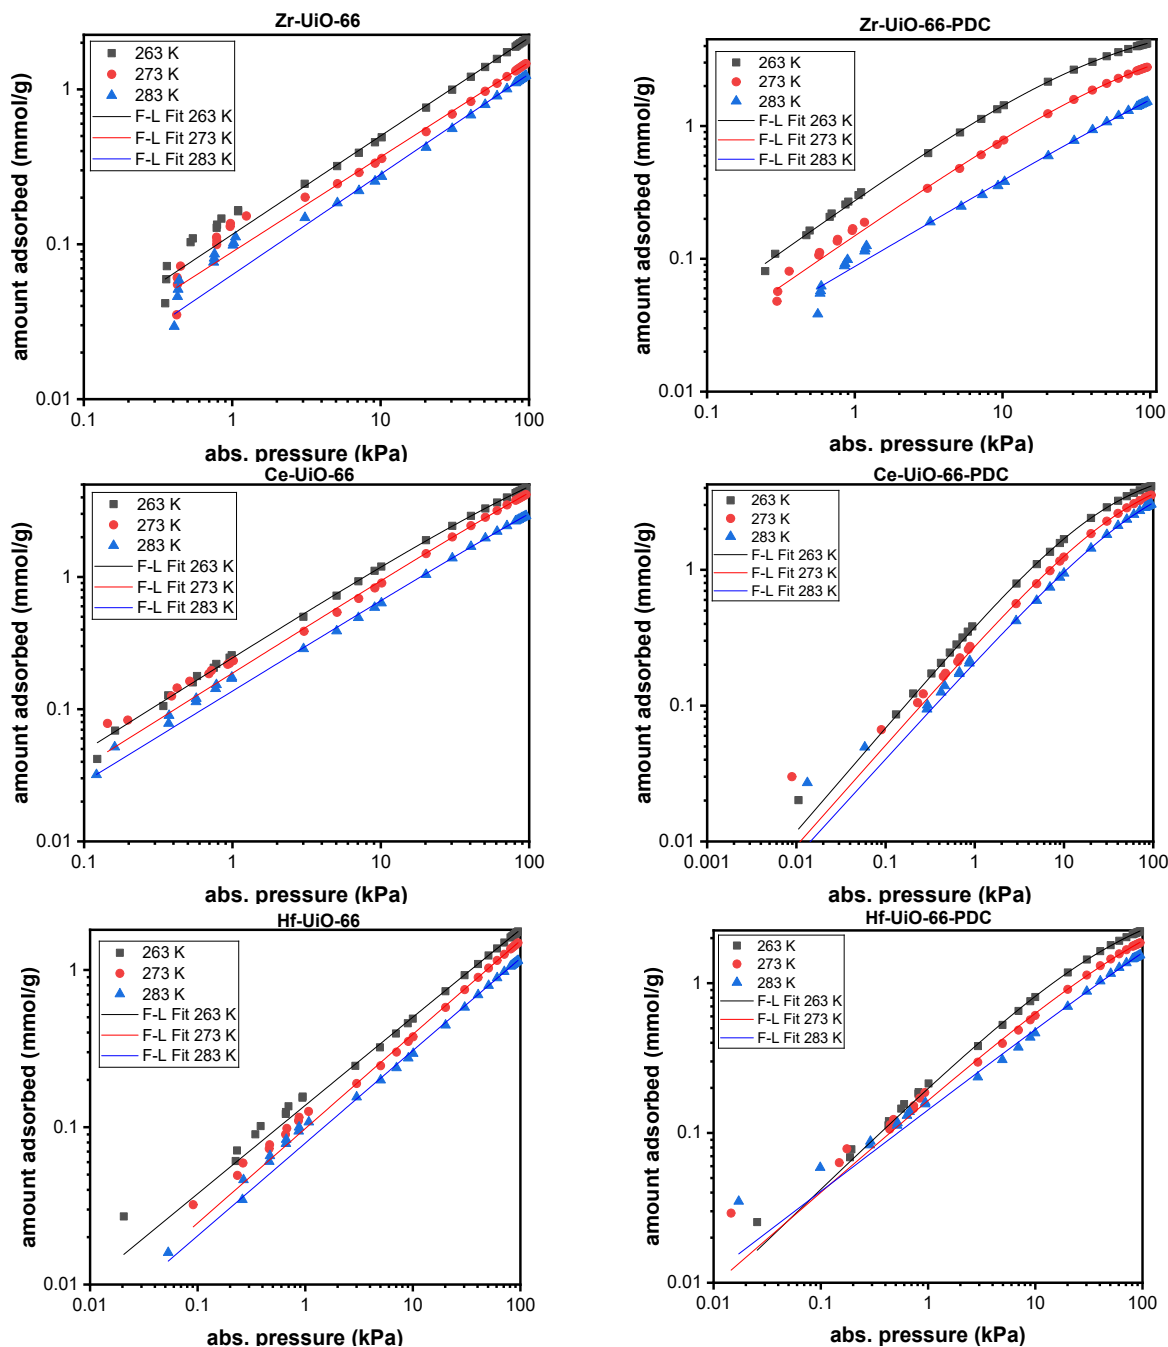

Figure S9. CO<sub>2</sub> adsorption curves under logarithmic scale to visualize the error at low pressures.

**Table S5.** CO<sub>2</sub> adsorption of the materials at the maximum measured pressure.

| Compound      | Uptake at 95 kPa and 263 K [mmol g <sup>-1</sup> ] | Uptake at 95 kPa and 273 K [mmol g <sup>-1</sup> ] | Uptake at 95 kPa and 283 K [mmol g <sup>-1</sup> ] |
|---------------|----------------------------------------------------|----------------------------------------------------|----------------------------------------------------|
| Zr-UiO-66     | 2.10                                               | 1.46                                               | 1.23                                               |
| Zr-UiO-66-PDC | 4.18                                               | 2.77                                               | 1.53                                               |
| Ce-UiO-66     | 4.72                                               | 4.20                                               | 2.90                                               |
| Ce-UiO-66-PDC | 4.12                                               | 3.54                                               | 3.04                                               |
| Hf-UiO-66     | 1.76                                               | 1.49                                               | 1.15                                               |
| Hf-UiO-66-PDC | 2.22                                               | 1.86                                               | 1.54                                               |

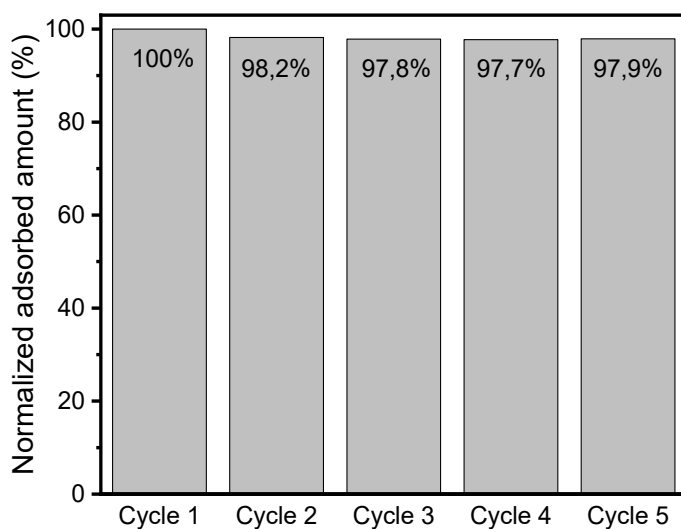

**Figure S10.** Comparison of adsorption capacity between cycles of Zr-UiO-66-PDC, all cycles have been normalized respective to first cycle.

## Computational Analysis

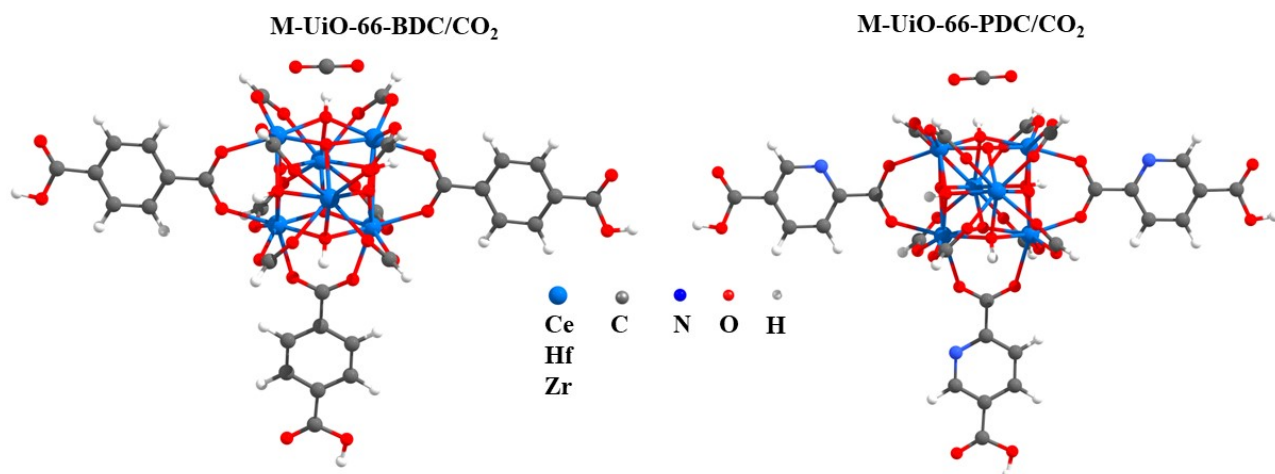

**Figure S11.** Structural Model  $M_6O_4(OH)_4(\text{Linker})_3(\text{HCOO}^-)_8/\text{CO}_2$  ( $M = \text{Zr (IV), Ce (IV), and Hf (IV)}$ ; linker = BDC or PDC), representation of the M-UiO-66 truncated

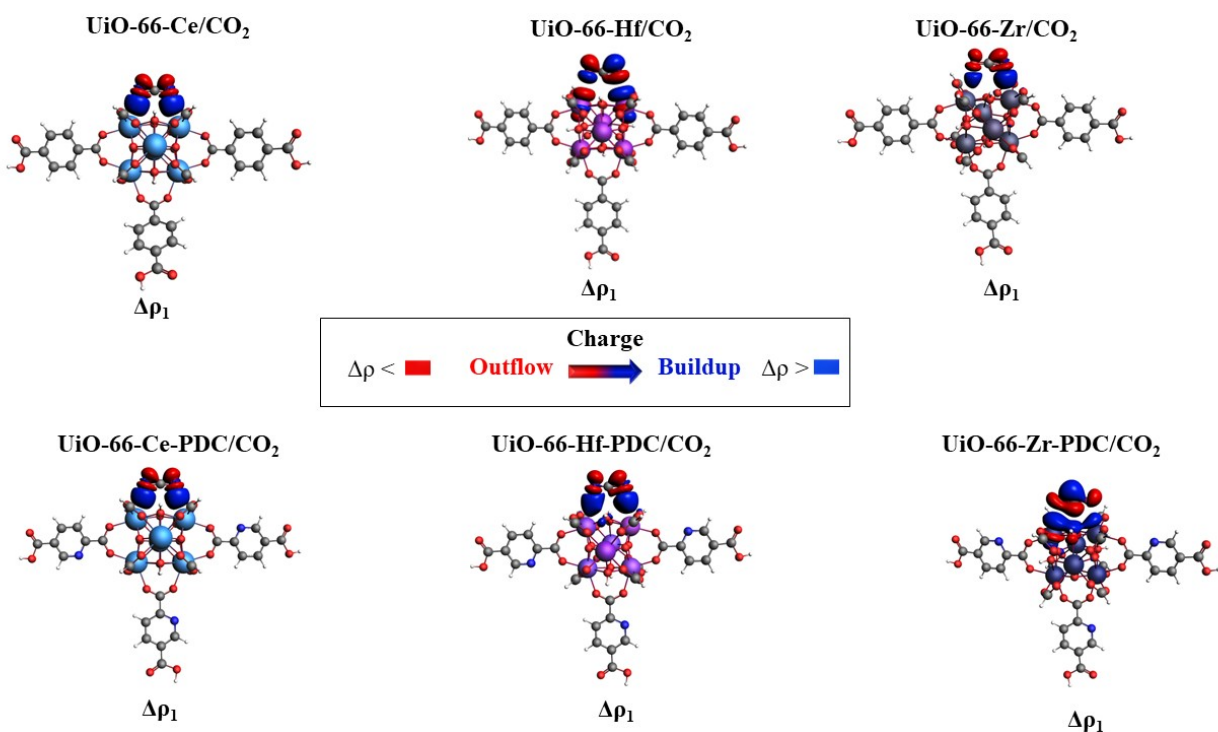

**Figure S12.** Contours of deformation density channels ( $\Delta\rho_1$ ) with the corresponding energies, in kcal/mol, describing the donor–acceptor interaction in M-UiO-66/CO<sub>2</sub> systems

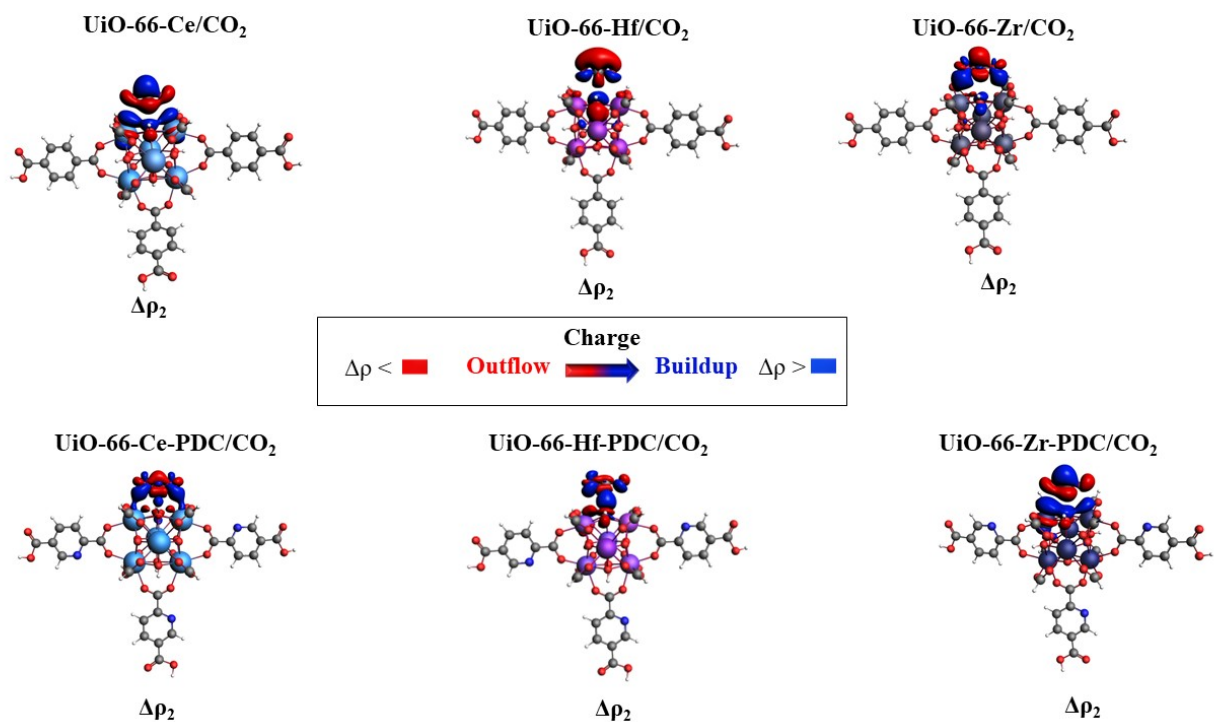

**Figure S13.** Contours of deformation density channels ( $\Delta\rho_2$ ) with the corresponding energies, in kcal/mol, describing the donor–acceptor interaction in M-UiO-66/ $\text{CO}_2$  systems

**Table S6.** Selected bond lengths and hydrogen bond in the Ground state ( $S_0$ ) distances (Å) at M06L/TZ2P/ZORA

| Materials/              | M-O1<br>(M- $\mu_3$ -OH) | M-O2<br>(M- $\mu_3$ -O) | M-O3<br>(M-OOC-R) |
|-------------------------|--------------------------|-------------------------|-------------------|
| UiO-66-Zr               | 2.25(5)                  | 2.12(5)                 | 2.21(1)           |
| UiO-66-Ce               | 2.44(3)                  | 2.28(2)                 | 2.36(0)           |
| UiO-66-Hf               | 2.26(5)                  | 2.13(4)                 | 2.21(2)           |
| UiO-66-Zr <sup>8</sup>  | 2.27                     | 2.07                    | 2.23              |
| UiO-66-Ce <sup>9</sup>  | 2.45                     | 2.25                    | 2.47              |
| UiO-66-Hf <sup>10</sup> | 2.27                     | 2.06(7)                 | 2.21              |
| UiO-66-Zr-PDC           | 2.28(2)                  | 2.24(2)                 | 2.16(4)           |
| UiO-66-Ce-PDC           | 2.44(8)                  | 2.29(0)                 | 2.36(7)           |
| UiO-66-Hf-PDC           | 2.27(3)                  | 2.27(4)                 | 2.16(1)           |

Table S7. Optimized molecular structures of M-UiO-66 at M06L/ TZ2P/ZORA

M-UiO-66/CO<sub>2</sub> System

Ce-UiO-66/CO<sub>2</sub>

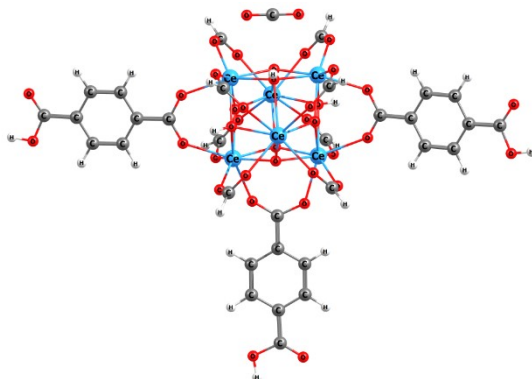

Ce-UiO-66-PDC

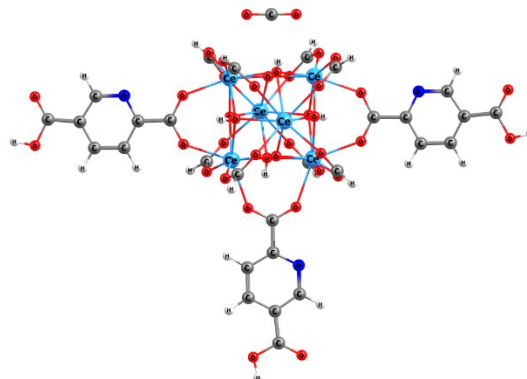

Zr-UiO-66/CO<sub>2</sub>

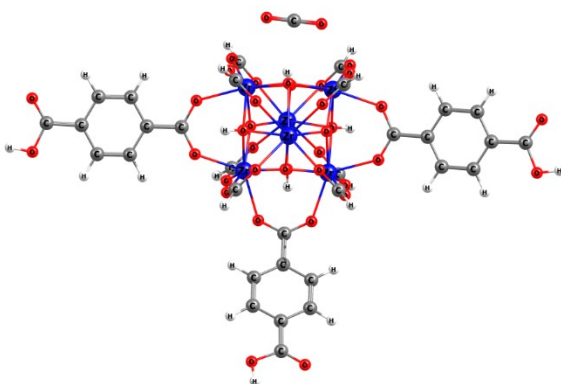

Zr-UiO-66-PDC/CO<sub>2</sub>

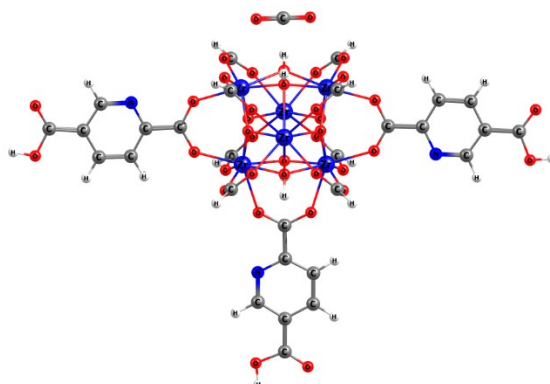

Hf-UiO-66/CO<sub>2</sub>

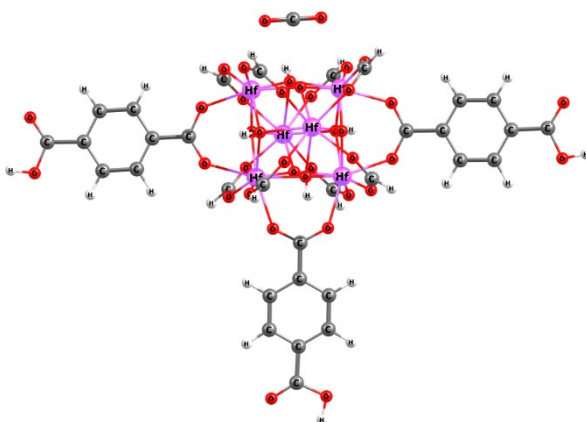

Hf-UiO-66-PDC/CO<sub>2</sub>

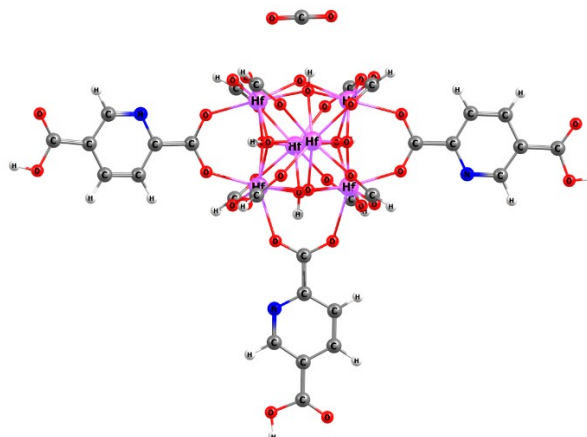



**Table S8.** Selected bond lengths and hydrogen bond in the Ground state ( $S_0$ ) distances (Å) at M06-L/ TZ2P/ZORA theoretical level.

| Materials/                             | M $\cdots$ CO <sub>2</sub> | -O-H $\cdots$ CO <sub>2</sub><br>(- $\mu_3$ -OH) | O $\cdots$ CO <sub>2</sub><br>(- $\mu_3$ -O) |
|----------------------------------------|----------------------------|--------------------------------------------------|----------------------------------------------|
| UiO-66-Ce $\cdots$ CO <sub>2</sub>     | 3.040                      | 3.296                                            | 3.362                                        |
| UiO-66-Zr $\cdots$ CO <sub>2</sub>     | 2.962                      | 3.173                                            | 3.231                                        |
| UiO-66-Hf $\cdots$ CO <sub>2</sub>     | 2.925                      | 3.150                                            | 3.180                                        |
| UiO-66-Ce-PDC $\cdots$ CO <sub>2</sub> | 3.035                      | 3.300                                            | 3.342                                        |
| UiO-66-Zr-PDC $\cdots$ CO <sub>2</sub> | 3.181                      | 3.063                                            | 3.090                                        |
| UiO-66-Hf-PDC $\cdots$ CO <sub>2</sub> | 3.374                      | 3.038                                            | 3.025                                        |

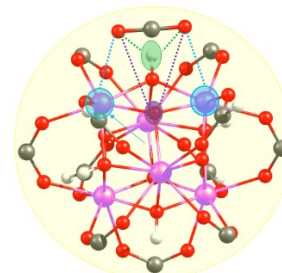

**Table S9.** Morokuma–Ziegler scheme energy decomposition analysis (EDA), values in kcal/mol, for all interacting systems M-UiO-66/CO<sub>2</sub>.

| System        | $\Delta E_{\text{Pauli}}$ | $\Delta E_{\text{Elec}}$ | $\Delta E_{\text{Orb}}$ | $\Delta E_{\text{Disp}}$ | $\Delta E_{\text{Int}}$ |
|---------------|---------------------------|--------------------------|-------------------------|--------------------------|-------------------------|
| UiO-66-Zr     | 16.82                     | -10.37 (42 %)            | -7.54 (31%)             | -6.75 (27 %)             | <b>-7.83</b>            |
| UiO-66-Ce     | 13.55                     | -9.28 (42 %)             | -6.67 (31%)             | -5.91 (27 %)             | <b>-8.31</b>            |
| UiO-66-Hf     | 18.82                     | -12.27 (45 %)            | -8.49 (31%)             | -6.39 (24 %)             | <b>-8.33</b>            |
| UiO-66-Zr-PDC | 11.75                     | -8.97 (48 %)             | -4.77 (22 %)            | -6.02 ( 29%)             | <b>-8.01</b>            |
| UiO-66-Ce-PDC | 13.67                     | -9.36 (45%)              | -6.85 (24 %)            | -5.92 (30 %)             | <b>-8.46</b>            |
| UiO-66-Hf-PDC | 10.54                     | -8.34 (42 %)             | -3.87 (31%)             | -5.00 ( 27 %)            | <b>-6.67</b>            |

## Kinetics of adsorption

Kinetics data was obtained from the same report of CO<sub>2</sub> adsorption capacity experiments, where the points are collected in a batch system in the relative pressure range of  $0.05 \leq P/P_0 \leq 0.99$ . That means each point is graphed as an amount adsorbed in function of time. The amount adsorbed is obtained by adding a small known amount of adsorbate (CO<sub>2</sub>) and taking the time it takes to the pressure to stop reducing (and that is converted to an adsorbed amount). Then another aliquote of adsorbate is added to graph another point and the process is repeated until de relative pressure reaches the value of 0.99.

### Kinetic Model

**Table S10.** Resume of avrami's kinetic model parameters.

|               |                 | Avrami fractional-order |         |         |
|---------------|-----------------|-------------------------|---------|---------|
|               |                 | 263 K                   | 273 K   | 283 K   |
| UiO-66-Zr     | K <sub>Av</sub> | 0.03064                 | 0.02994 | 0.03008 |
|               | n <sub>Av</sub> | 3.8283                  | 3.90391 | 4.30755 |
|               | q <sub>e</sub>  | 2.05989                 | 1.4636  | 1.2108  |
|               | R <sup>2</sup>  | 0.99449                 | 0.99075 | 0.99154 |
| UiO-66-Zr-PDC | K <sub>Av</sub> | 0.02851                 | 0.03326 | 0.02688 |
|               | n <sub>Av</sub> | 3.88066                 | 4.34535 | 3.57448 |
|               | q <sub>e</sub>  | 4.18614                 | 2.72374 | 1.52613 |
|               | R <sup>2</sup>  | 0.99414                 | 0.99597 | 0.9959  |
| UiO-66-Ce     | K <sub>Av</sub> | 0.0309                  | 0.0312  | 0.03095 |
|               | n <sub>Av</sub> | 3.80977                 | 4.50818 | 4.17657 |
|               | q <sub>e</sub>  | 4.62802                 | 4.0901  | 2.84934 |
|               | R <sup>2</sup>  | 0.99717                 | 0.9959  | 0.99639 |
| UiO-66-Ce-PDC | K <sub>Av</sub> | 0.03156                 | 0.03132 | 0.03154 |
|               | n <sub>Av</sub> | 2.83463                 | 3.52024 | 3.73543 |
|               | q <sub>e</sub>  | 4.15888                 | 3.5137  | 3.00462 |
|               | R <sup>2</sup>  | 0.99681                 | 0.99692 | 0.99726 |
| UiO-66-Hf     | K <sub>Av</sub> | 0.03179                 | 0.03155 | 0.03154 |
|               | n <sub>Av</sub> | 3.7351                  | 3.93656 | 3.94531 |
|               | q <sub>e</sub>  | 1.73921                 | 1.47132 | 1.13783 |
|               | R <sup>2</sup>  | 0.99394                 | 0.99408 | 0.9922  |
| UiO-66-Hf-PDC | K <sub>Av</sub> | 0.03336                 | 0.03232 | 0.03301 |
|               | n <sub>Av</sub> | 3.69314                 | 4.03082 | 3.73094 |
|               | q <sub>e</sub>  | 2.22111                 | 1.85187 | 1.54021 |
|               | R <sup>2</sup>  | 0.99453                 | 0.99163 | 0.99177 |

**Table S11.** Resume of pseudo-first order and pseudo-second order kinetic model parameters.

|               |       | Pseudo-first order |         |         |       | Pseudo-second order |          |         |
|---------------|-------|--------------------|---------|---------|-------|---------------------|----------|---------|
|               |       | 263 K              | 273 K   | 283 K   |       | 263 K               | 273 K    | 283 K   |
| UiO-66-Zr     | $K_1$ | 0.02587            | 0.01769 | 0.02224 | $K_s$ | 0.0024              | 0.00153  | 0.00282 |
|               | $q_e$ | 3.61239            | 3.38092 | 2.44738 | $q_e$ | 6.26893             | 6.24395  | 4.40217 |
|               | $R^2$ | 0.96797            | 0.95882 | 0.95719 | $R^2$ | 0.96625             | 0.95792  | 0.9559  |
| UiO-66-Zr-PDC | $K_1$ | 0.03099            | 0.04563 | 0.02867 | $K_s$ | 0.00186             | 0.0052   | 0.00446 |
|               | $q_e$ | 6.28184            | 3.68129 | 2.36023 | $q_e$ | 10.35126            | 5.79622  | 3.93397 |
|               | $R^2$ | 0.96464            | 0.96957 | 0.98112 | $R^2$ | 0.96163             | 0.965    | 0.97948 |
| UiO-66-Ce     | $K_1$ | 0.02917            | 0.02489 | 0.0235  | $K_s$ | 0.00136             | 0.00105  | 0.00135 |
|               | $q_e$ | 7.54962            | 7.57988 | 5.48316 | $q_e$ | 12.81406            | 13.40191 | 9.76773 |
|               | $R^2$ | 0.97526            | 0.95614 | 0.96598 | $R^2$ | 0.9733              | 0.95421  | 0.96453 |
| UiO-66-Ce-PDC | $K_1$ | 0.03865            | 0.04883 | 0.04606 | $K_s$ | 0.00323             | 0.00535  | 0.00525 |
|               | $q_e$ | 5.33483            | 4.34943 | 3.89047 | $q_e$ | 8.20574             | 6.51222  | 5.9926  |
|               | $R^2$ | 0.97512            | 0.97654 | 0.97767 | $R^2$ | 0.9709              | 0.97177  | 0.97346 |
| UiO-66-Hf     | $K_1$ | 0.03381            | 0.02932 | 0.02889 | $K_s$ | 0.00469             | 0.00408  | 0.00512 |
|               | $q_e$ | 2.6633             | 2.47306 | 1.93022 | $q_e$ | 4.42619             | 4.2417   | 3.31967 |
|               | $R^2$ | 0.96735            | 0.96549 | 0.961   | $R^2$ | 0.96476             | 0.96344  | 0.95894 |
| UiO-66-Hf-PDC | $K_1$ | 0.04893            | 0.04521 | 0.04314 | $K_s$ | 0.00764             | 0.00754  | 0.00831 |
|               | $q_e$ | 2.8672             | 2.51033 | 2.12021 | $q_e$ | 4.402               | 3.95864  | 3.37799 |
|               | $R^2$ | 0.96134            | 0.95555 | 0.96258 | $R^2$ | 0.95611             | 0.95092  | 0.95862 |

For pseudo-first and pseudo-second order the time  $t = 0$  was determined at the point where  $dq_t/dt \neq 0$ .

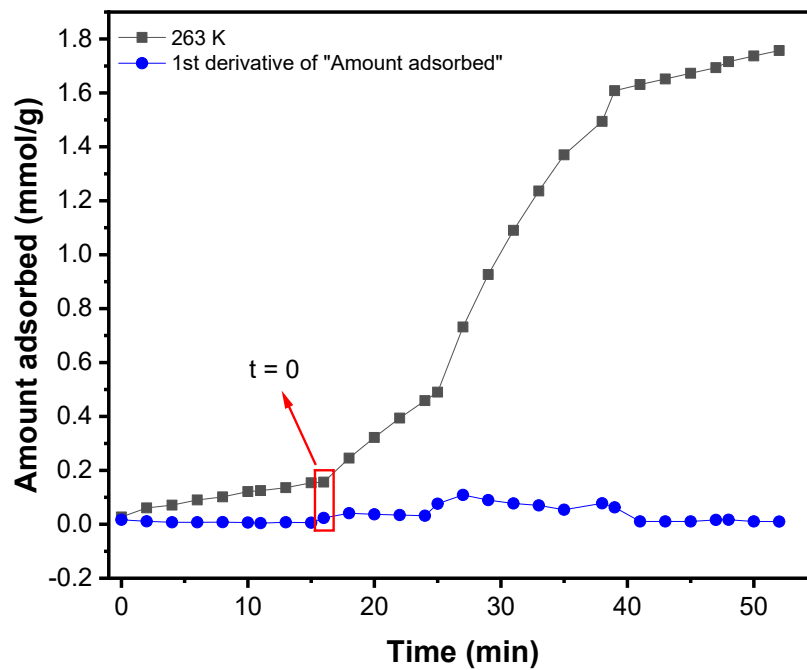

**Figure S14.** Example of the determination of time  $t = 0$  for the non-linear fit of pseudo-first and pseudo-second order kinetic models.

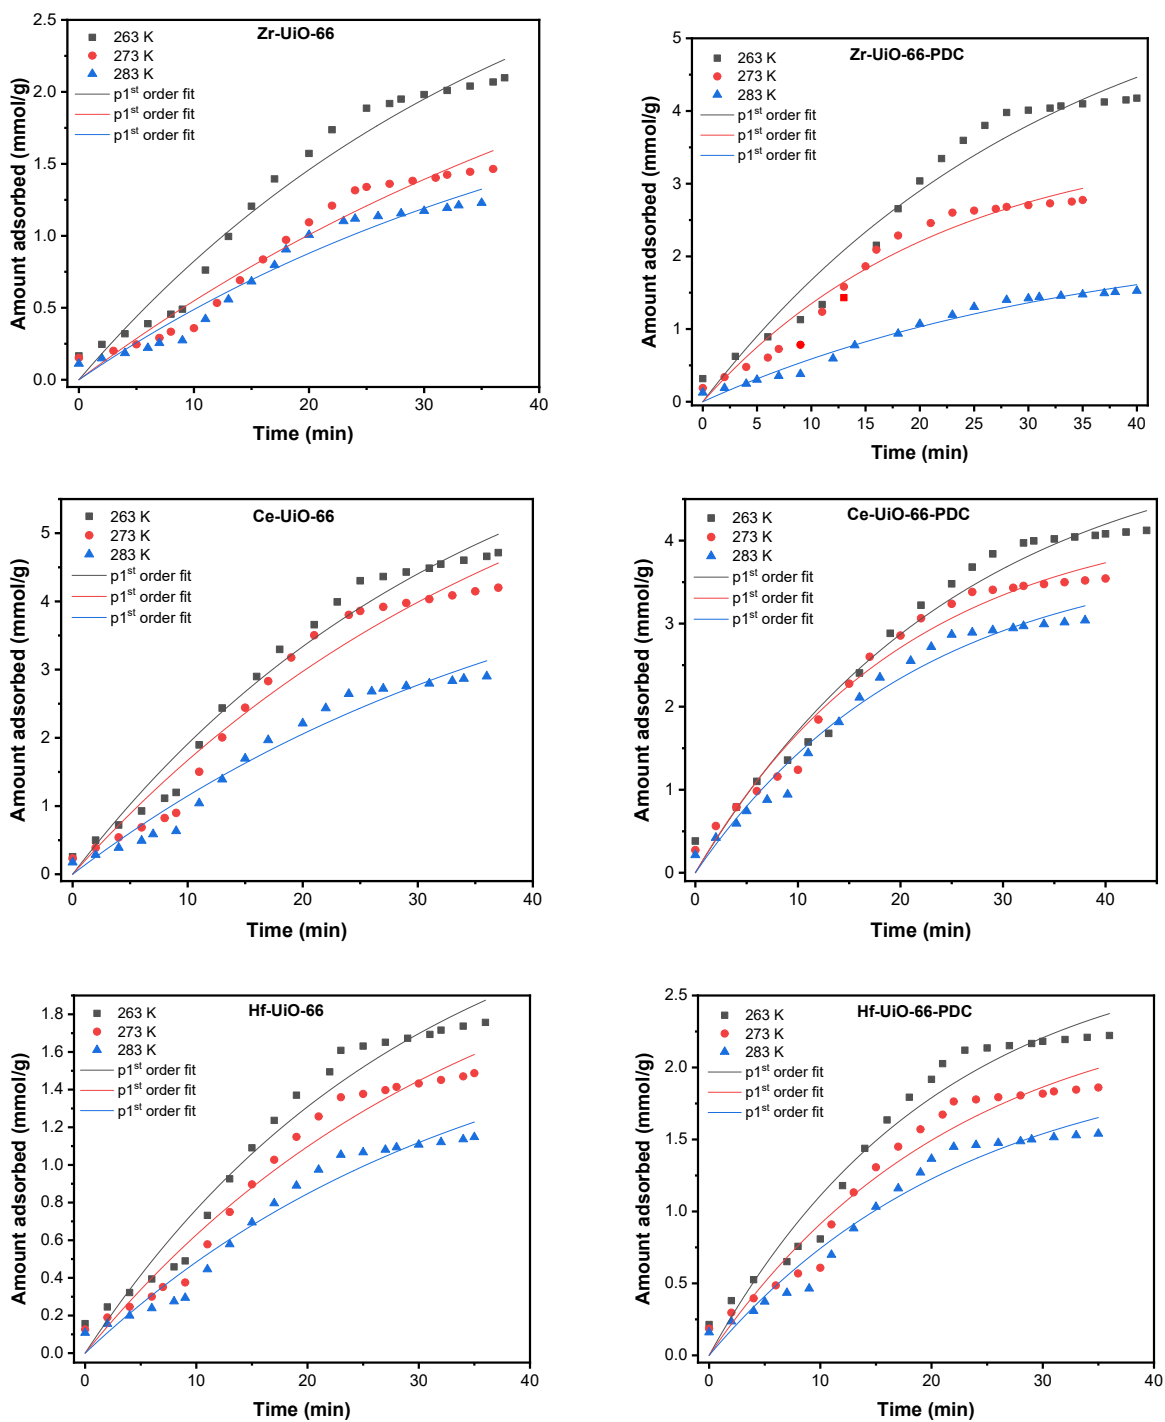

Figure S15. Non-linear fit of pseudo-first order kinetic model.

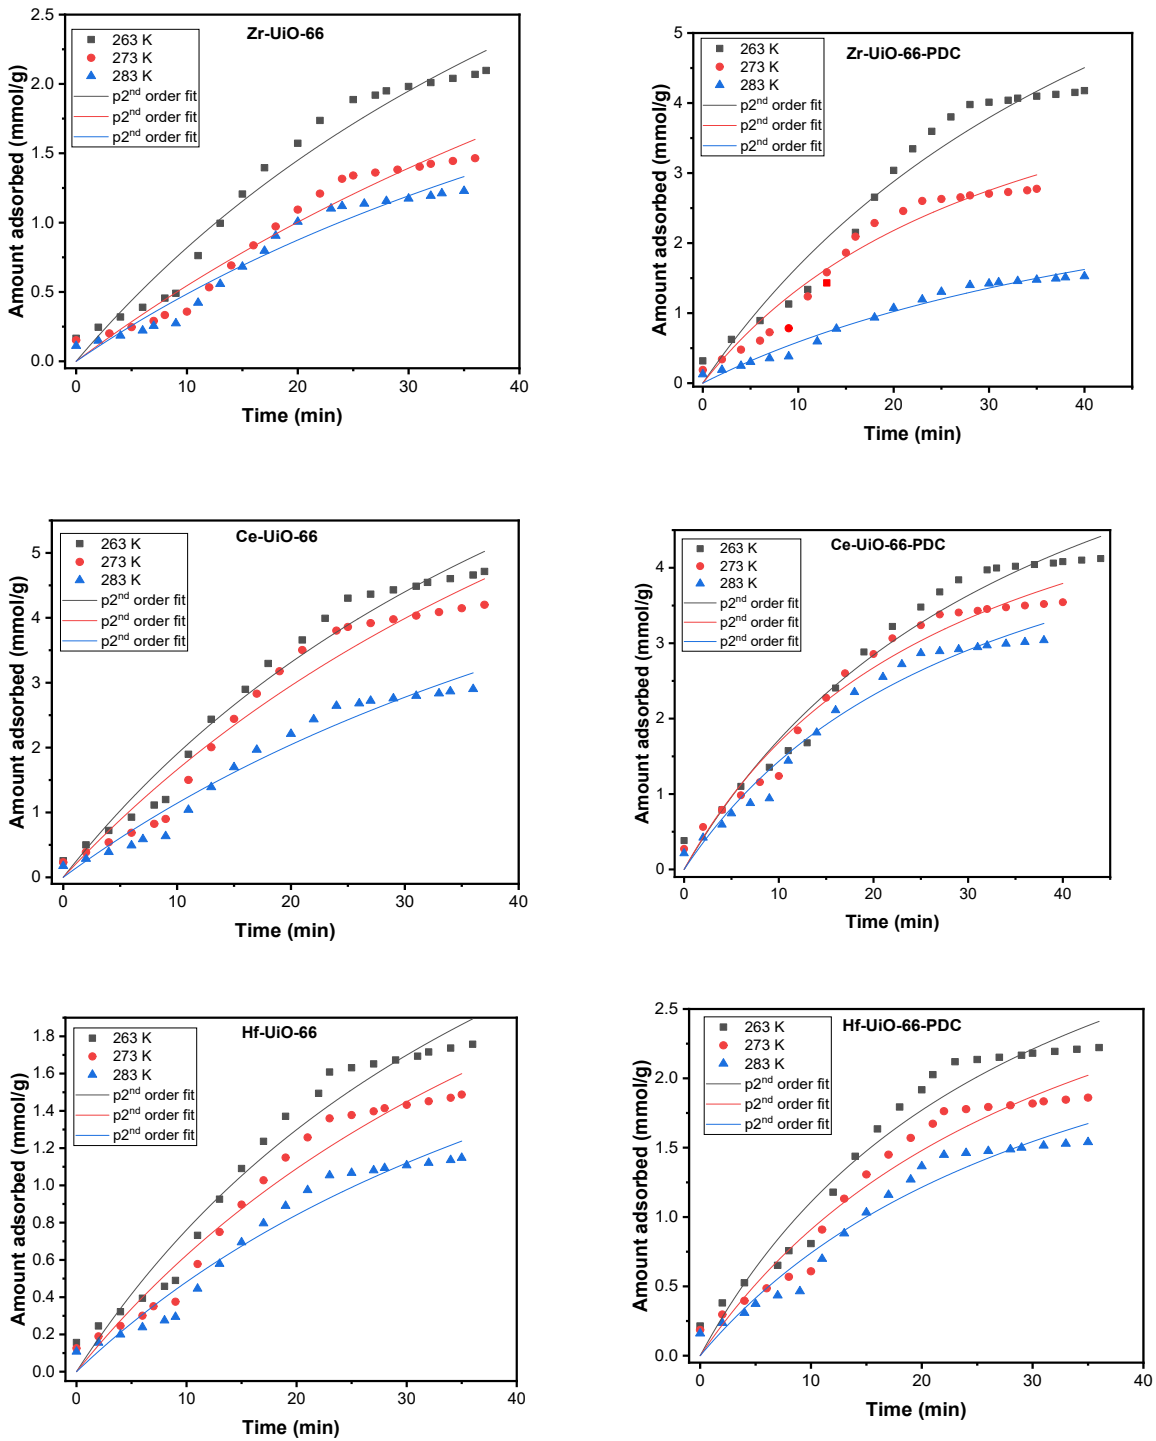

Figure S16. Non-linear fit of pseudo-second order kinetic model.

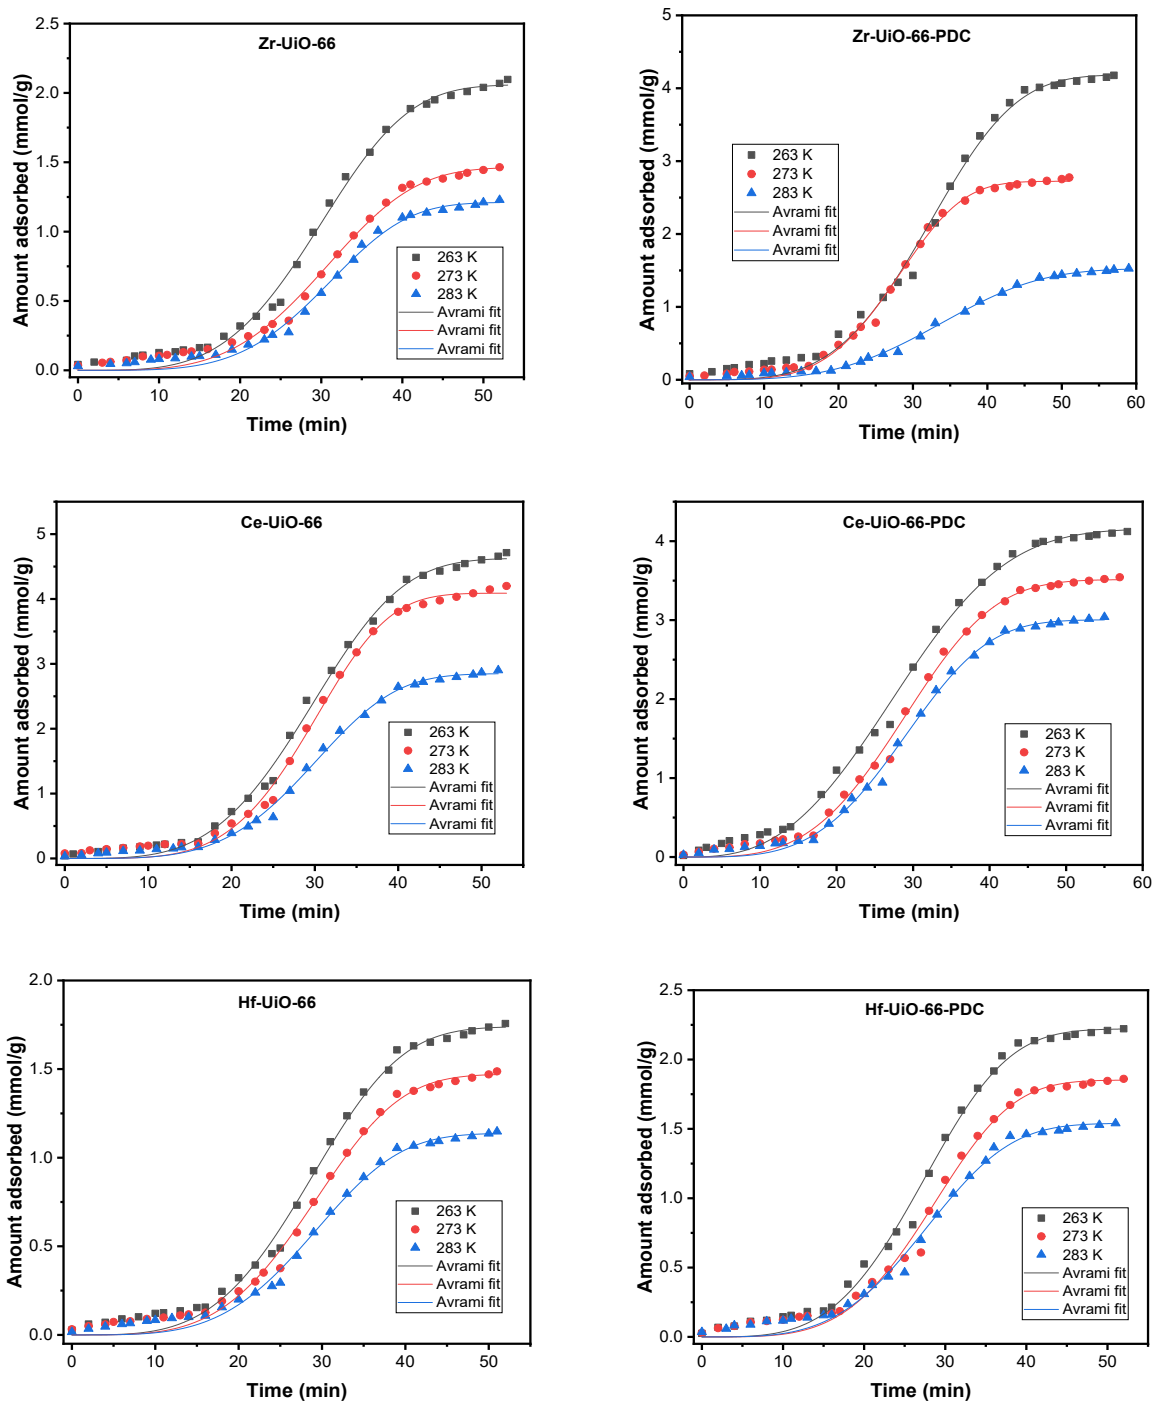

**Figure S17.** Effect of temperature on curves of CO<sub>2</sub> adsorption against time onto M-UiO-66 (M = Zr (IV), Ce (IV), Hf (IV)) with BDC or PDC linker.

## Rate-limiting kinetic model

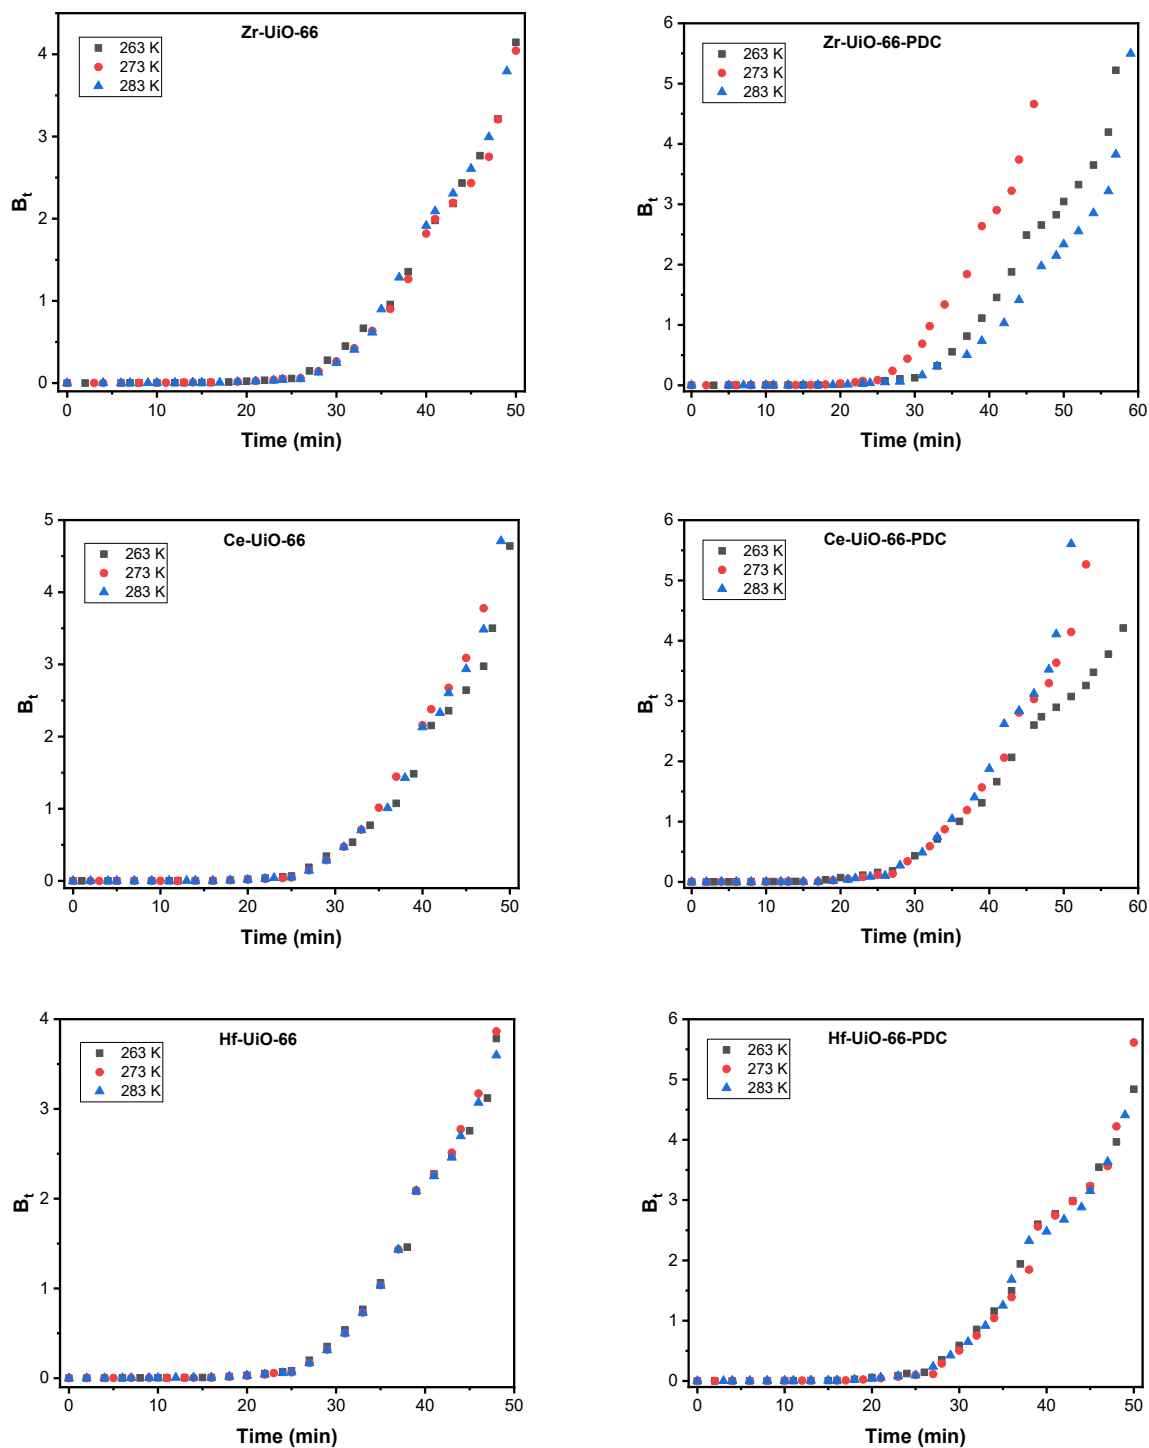

**Figure S18.** Plots of Boyd's film diffusion model for CO<sub>2</sub> adsorption onto M-UiO-66 with BDC or PDC linker under different temperatures.



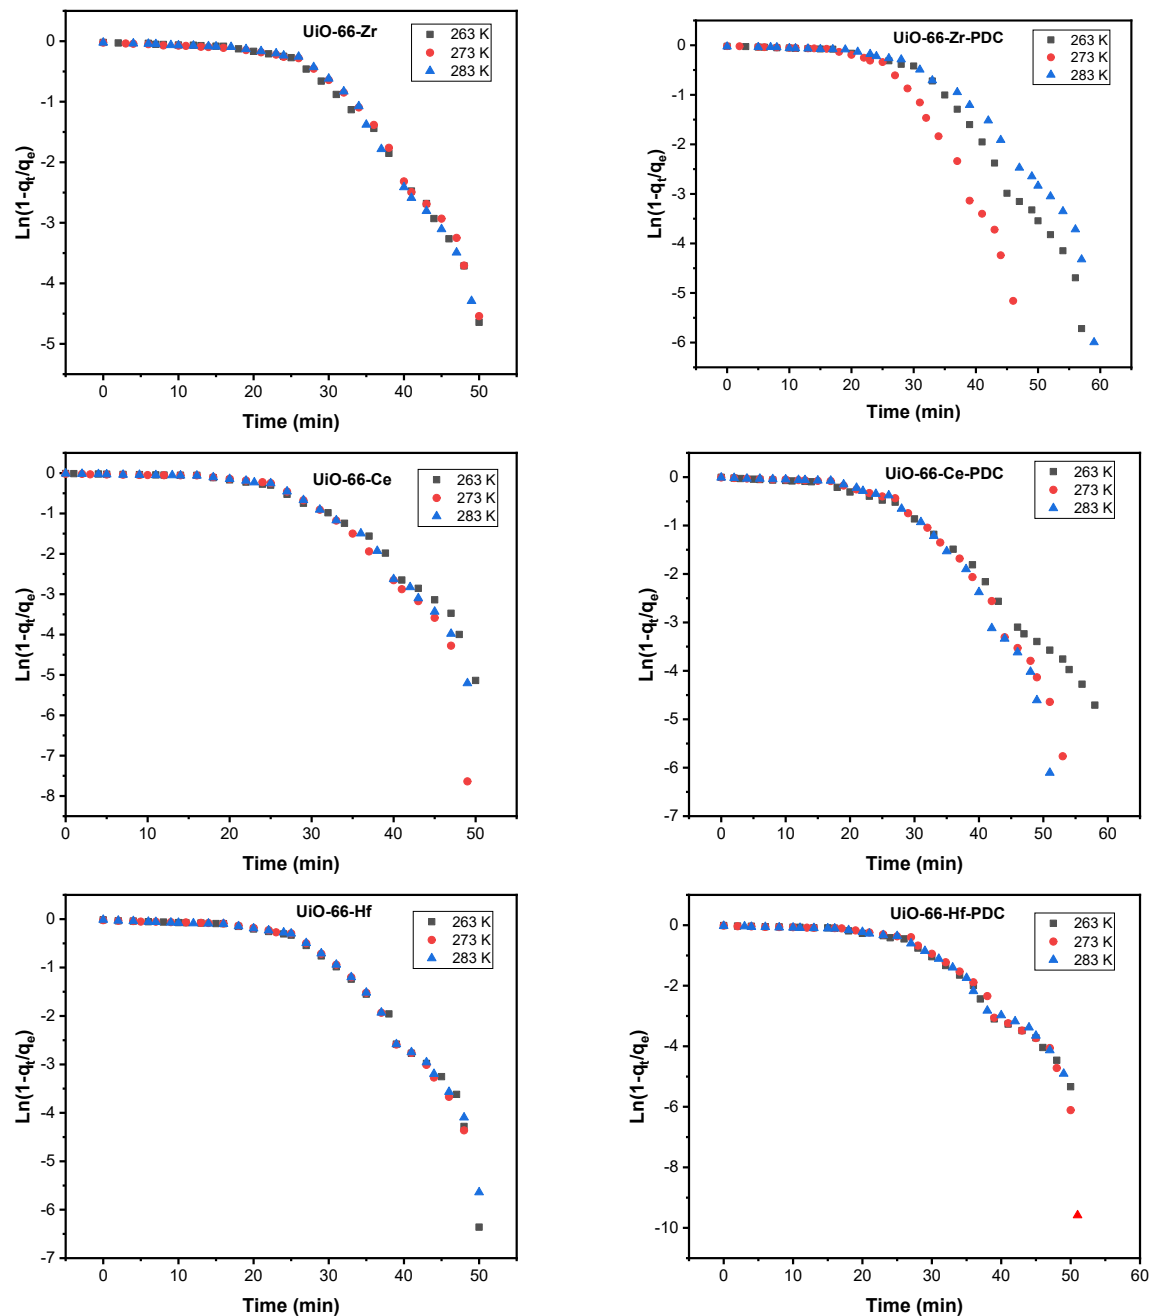

**Figure S19.** Plots of interparticle diffusion model for CO<sub>2</sub> adsorption onto M-UiO-66 with BDC or PDC linker under different temperatures.

**Table S12.** Linear fitting parameters of interparticle diffusion model.

| Material      | Temperature | Slope    | Intercept | R <sup>2</sup> |
|---------------|-------------|----------|-----------|----------------|
| UiO-66-Zr     | 263 K       | -0.08619 | 1.07412   | 0.81648        |
|               | 273 K       | -0.0973  | 1.09153   | 0.76701        |
|               | 283 K       | -0.07941 | 1.13155   | 0.79124        |
| UiO-66-Zr-PDC | 263 K       | -0.08039 | 0.95016   | 0.79213        |
|               | 273 K       | -0.07721 | 0.89019   | 0.78001        |
|               | 283 K       | -0.0778  | 0.9457    | 0.77116        |
| UiO-66-Ce     | 263 K       | -0.08329 | 0.93442   | 0.77914        |
|               | 273 K       | -0.09798 | 1.14522   | 0.66041        |
|               | 283 K       | -0.08561 | 0.97891   | 0.75912        |
| UiO-66-Ce-PDC | 263 K       | -0.08051 | 0.81262   | 0.89778        |
|               | 273 K       | -0.09418 | 1.10393   | 0.81448        |
|               | 283 K       | -0.09666 | 1.14354   | 0.78223        |
| UiO-66-Hf     | 263 K       | -0.09319 | 1.08837   | 0.75149        |
|               | 273 K       | -0.08061 | 0.87309   | 0.78521        |
|               | 283 K       | -0.08856 | 0.99759   | 0.77101        |
| UiO-66-Hf-PDC | 263 K       | -0.09853 | 1.09127   | 0.8262         |
|               | 273 K       | -0.10121 | 1.18231   | 0.7802         |
|               | 283 K       | -0.09254 | 1.02646   | 0.81829        |

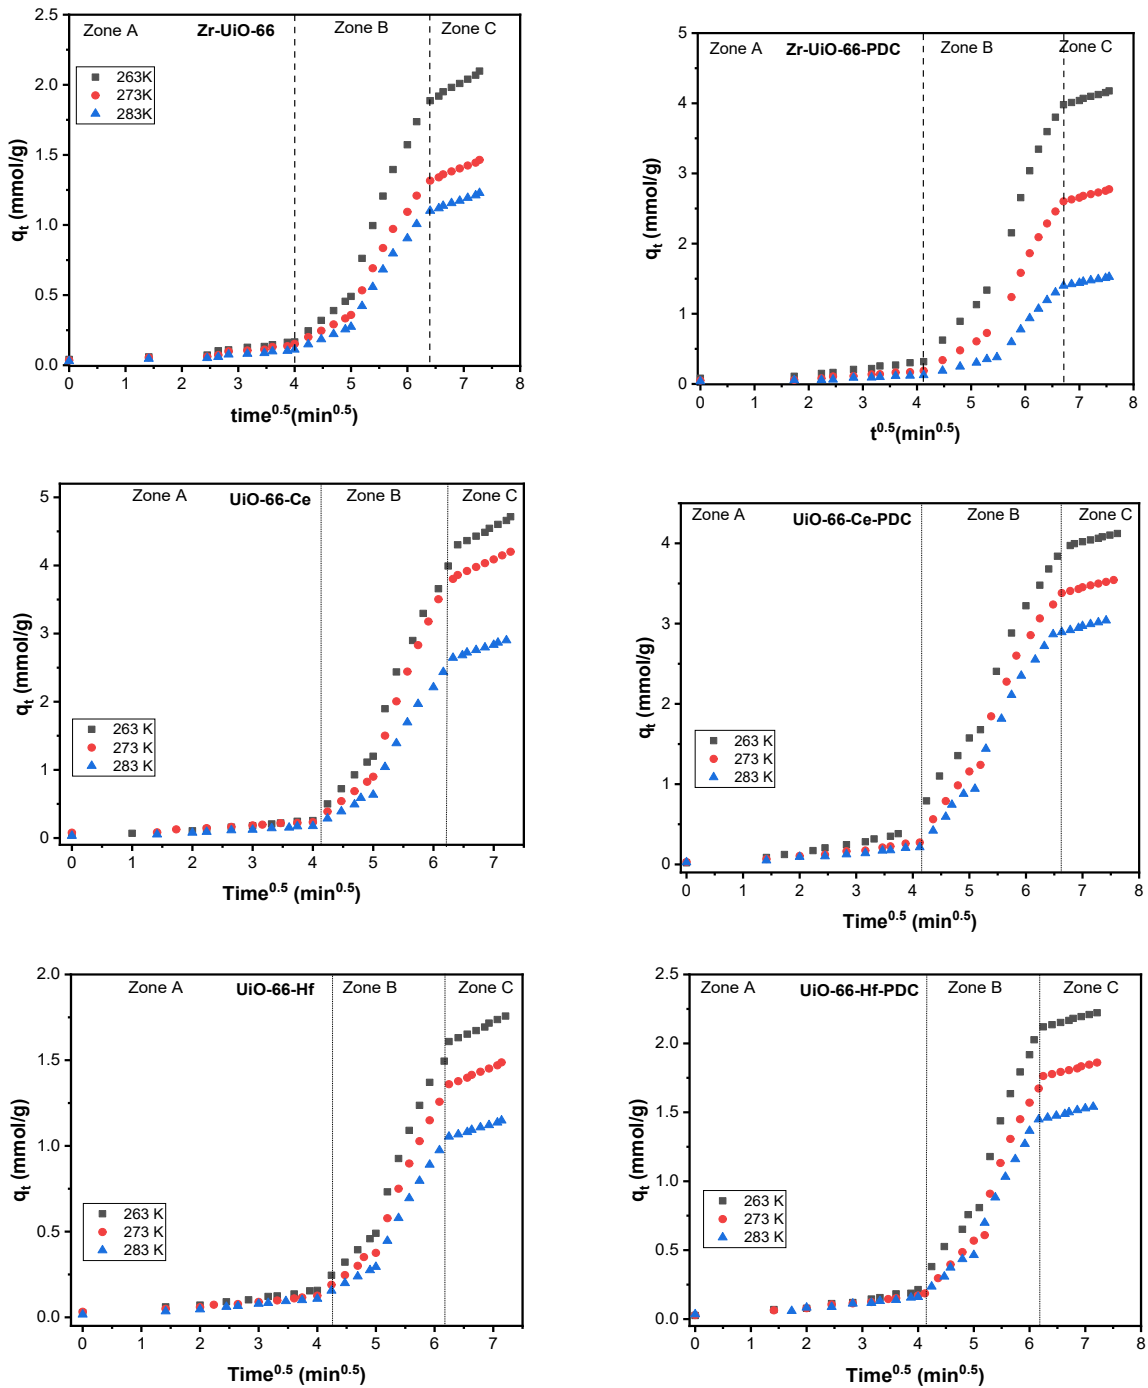

**Figure S20.** Plots of intraparticle diffusion model onto M-UiO-66 with BDC or PDC linker under different temperatures.

## Isosteric Heat

Calculations of the isosteric heats using the Clausius-Clapeyron equation were performed with a temperature difference of 20 K.

**Table S13.** Short bibliographic research on CO<sub>2</sub> adsorption and reported isosteric heats of different MOFs.

| Material                         | Adsorbate       | Experimental conditions | Amount adsorbed (mmol g <sup>-1</sup> ) | Q <sub>st</sub> (kJ mol <sup>-1</sup> ) |                   | Ref.      |
|----------------------------------|-----------------|-------------------------|-----------------------------------------|-----------------------------------------|-------------------|-----------|
|                                  |                 |                         |                                         | a = Zero/Low coverage                   | b = High coverage |           |
| Hf-UiO-66                        | CO <sub>2</sub> | 273-298 K and 1 bar     | 2,38                                    | 22,8 <sup>a</sup>                       |                   | 11        |
| Hf-UiO-66-NH <sub>2</sub>        | CO <sub>2</sub> | 273-298 K and 1 bar     | 3,99                                    | 25,6 <sup>a</sup>                       |                   | 11        |
| Hf-UiO-66-(OH) <sub>2</sub>      | CO <sub>2</sub> | 273-298 K and 1 bar     | 4,93                                    | 28,4 <sup>a</sup>                       |                   | 11        |
| Hf-UiO-66-(COOH) <sub>2</sub>    | CO <sub>2</sub> | 273-298 K and 1 bar     | 1,67                                    | 28,2 <sup>a</sup>                       |                   | 11        |
| Hf-UiO-66-F <sub>4</sub>         | CO <sub>2</sub> | 273-298 K and 1 bar     | 1,23                                    | 23,4 <sup>a</sup>                       |                   | 11        |
| Zr-UiO-67-BBS                    | CO <sub>2</sub> | 273-298 K and 760 torr  | 4,84                                    | 26,5 <sup>a</sup> ; 22,9 <sup>b</sup>   |                   | 12        |
| Hf-UiO-67-BBS                    | CO <sub>2</sub> | 273-298 K and 760 torr  | 4,45                                    | 25,1 <sup>a</sup>                       |                   | 12        |
| Zr-UiO-67                        | CO <sub>2</sub> | 273-298 K and 760 torr  | 2,17                                    | 18,5 <sup>a</sup>                       |                   | 12        |
| Zr-UiO-66-(OH) <sub>2</sub> -50  | CO <sub>2</sub> | 25-35 °C and 100 kPa    | 4,83                                    | 39,6 <sup>a</sup>                       |                   | 13        |
| Zr-UiO-66-(OH) <sub>2</sub> -250 | CO <sub>2</sub> | 25-35 °C and 100 kPa    | 5,63                                    | 31,5 <sup>a</sup>                       |                   | 13        |
| Mg-MOF-74                        | CO <sub>2</sub> | 273-296 K and 1 bar     | 8                                       | 47 <sup>a</sup> ; 30 <sup>b</sup>       |                   | 14        |
| Co-MOF-74                        | CO <sub>2</sub> | 273-296 K and 1 bar     | 7,1                                     | 37 <sup>a</sup> ; 36 <sup>b</sup>       |                   | 14        |
| Ni-MOF-74                        | CO <sub>2</sub> | 273-296 K and 1 bar     | 5,8                                     | 41 <sup>a</sup> ; 34 <sup>b</sup>       |                   | 14        |
| Carbonized MOF-5                 | CO <sub>2</sub> | 40-100 °C and 40 bar    | 2,43 (1 bar)                            | 18 <sup>a</sup> ; 12,5 <sup>b</sup>     |                   | 15        |
| Zr-UiO-66-1HCl                   | CO <sub>2</sub> | 298-318 K and 1 bar     | 1,66                                    | 25,9 <sup>a</sup>                       |                   | 16        |
| Zr-UiO-66-2FA                    | CO <sub>2</sub> | 298-318 K and 1 bar     | 1,42                                    | 21,5 <sup>a</sup>                       |                   | 16        |
| Zr-UiO-66                        | CO <sub>2</sub> | 263-283 K and 95 kPa    | 2,10                                    | 29,5 <sup>a</sup> ; 26,2 <sup>b</sup>   |                   | This work |
| Zr-UiO-66-PDC                    | CO <sub>2</sub> | 263-283 K and 95 kPa    | 4,17                                    | 45,5 <sup>a</sup> ; 66,0 <sup>b</sup>   |                   | This work |
| Hf-UiO-66                        | CO <sub>2</sub> | 263-283 K and 95 kPa    | 1,76                                    | 31,8 <sup>a</sup> ; 23,7 <sup>b</sup>   |                   | This work |
| Hf-UiO-66-PDC                    | CO <sub>2</sub> | 263-283 K and 95 kPa    | 2,22                                    | 3,65 <sup>a</sup> ; 29,6 <sup>b</sup>   |                   | This work |
| Ce-UiO-66                        | CO <sub>2</sub> | 263-283 K and 95 kPa    | 4,71                                    | 24,9 <sup>a</sup> ; 26,2 <sup>b</sup>   |                   | This work |
| Ce-UiO-66-PDC                    | CO <sub>2</sub> | 263-283 K and 95 kPa    | 4,12                                    | 21,5 <sup>a</sup> ; 30,5 <sup>b</sup>   |                   | This work |

The tabulated amount adsorbed corresponds to the captured adsorbent at the maximum pressure and the minimal temperature.

$Q_{st}$  calculated for each temperature combination.  
 Note that the average  $Q_{st}$  curve is hidden by the 263-283 K  $Q_{st}$  curve.

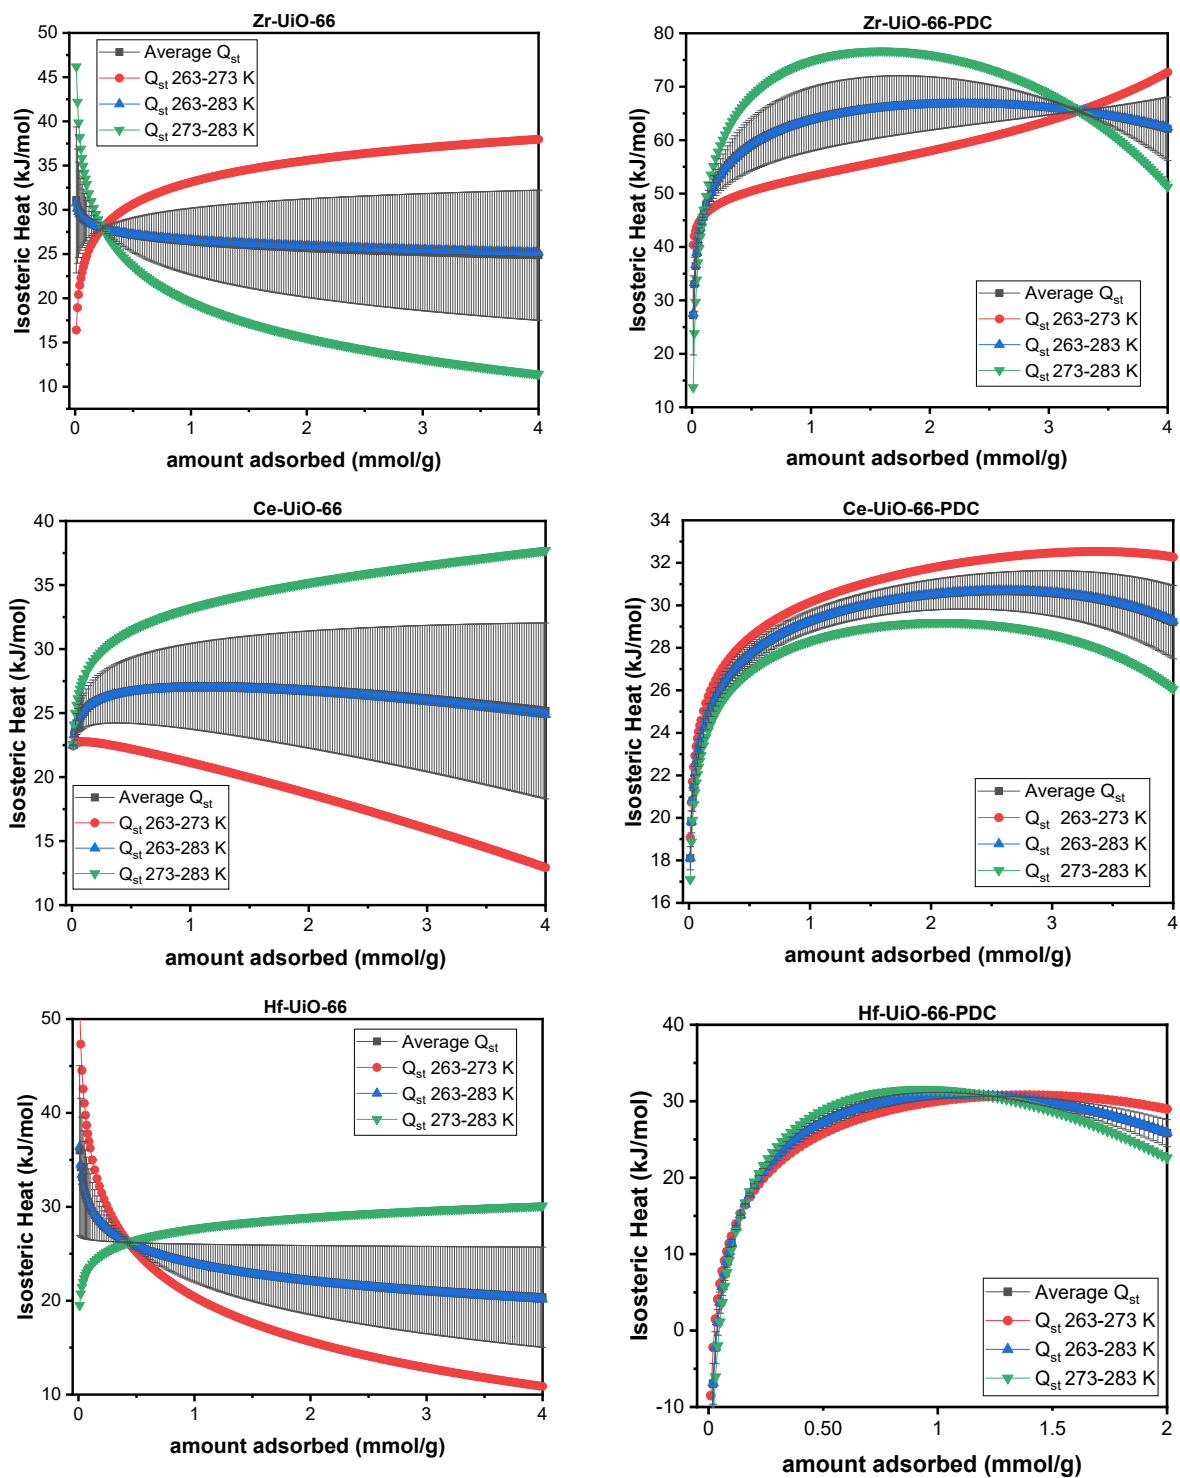

**Figure S21.**  $Q_{st}$  calculated for all temperature combinations.

Different perspectives of the isosteric heats.

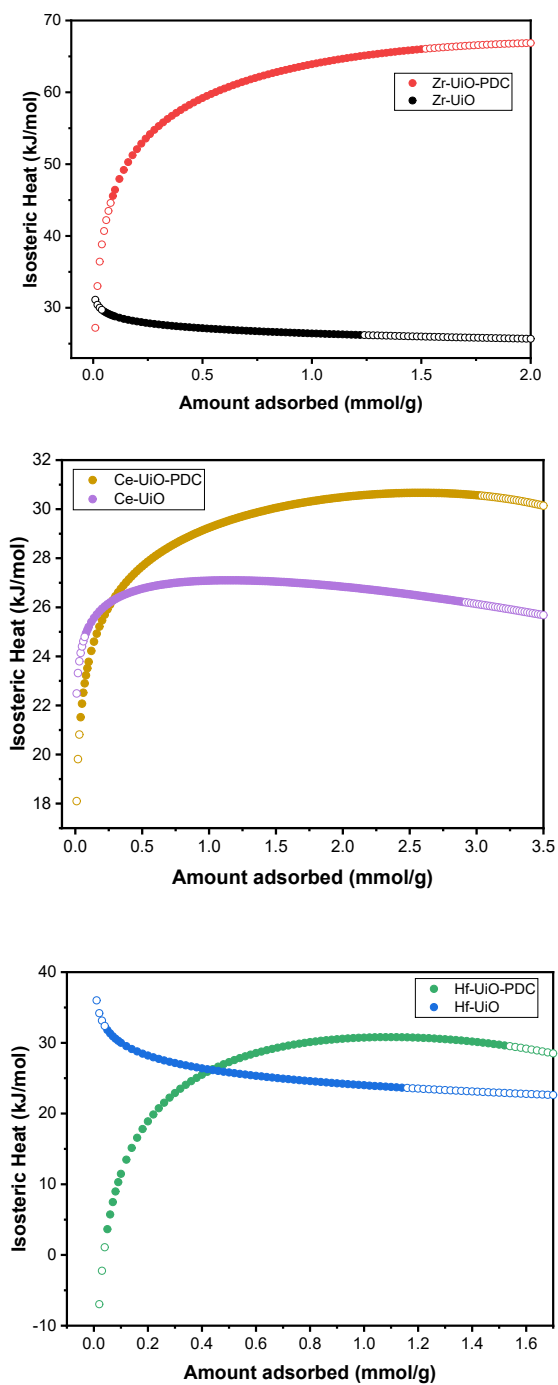

**Figure S22.** Isosteric heat in function of the amount adsorbed organized by metal center.

## References

- 1 M. J. Katz, Z. J. Brown, Y. J. Colón, P. W. Siu, K. A. Scheidt, R. Q. Snurr, J. T. Hupp and O. K. Farha, *Chemical Communications*, 2013, **49**, 9449–9451.
- 2 M. Lammert, M. T. Wharmby, S. Smolders, B. Bueken, A. Lieb, K. A. Lomachenko, D. De Vos and N. Stock, *Chemical Communications*, 2015, **51**, 12578–12581.
- 3 S. Waitschat, D. Fröhlich, H. Reinsch, H. Terraschke, K. A. Lomachenko, C. Lamberti, H. Kummer, T. Helling, M. Baumgartner, S. Henninger and N. Stock, *Dalton Transactions*, 2018, **47**, 1062–1070.
- 4 G. C. Shearer, S. Chavan, J. Ethiraj, J. G. Vitillo, S. Svelle, U. Olsbye, C. Lamberti, S. Bordiga and K. P. Lillerud, *Chemistry of Materials*, 2014, **26**, 4068–4071.
- 5 M. J. Cliffe, W. Wan, X. Zou, P. A. Chater, A. K. Kleppe, M. G. Tucker, H. Wilhelm, N. P. Funnell, F. X. Coudert and A. L. Goodwin, *Nat Commun*, , DOI:10.1038/ncomms5176.
- 6 R. C. Klet, Y. Liu, T. C. Wang, J. T. Hupp and O. K. Farha, *J Mater Chem A Mater*, 2016, **4**, 1479–1485.
- 7 I. A. Lázaro, *Eur J Inorg Chem*, 2020, **2020**, 4284–4294.
- 8 S. Huang, D. G. Truhlar, A. Tang, X. He, H. Yin, Y. Li and Y. Zhang, *Journal of Physical Chemistry C*, 2021, **125**, 9679–9687.
- 9 C. Pazo-Carballo, E. Blanco, E. Camu, A. Leiva, Y. Hidalgo-Rosa, X. Zarate, A. B. Dongil, E. Schott and N. Escalona, *ACS Appl Nano Mater*, , DOI:10.1021/acsnm.2c05555.
- 10 Y. Wei, A. Tang, X. He, H. Chen, H. Yin, Y. Li, Y. Zhang and S. Huang, *Journal of Physical Chemistry C*, 2022, **126**, 4286–4295.
- 11 Z. Hu, A. Nalaparaju, Y. Peng, J. Jiang and D. Zhao, *Inorg Chem*, 2016, **55**, 1134–1141.
- 12 P. Xydias, I. Spanopoulos, E. Klontzas, G. E. Froudakis and P. N. Trikalitis, *Inorg Chem*, 2014, **53**, 679–681.
- 13 T. K. Vo, V. C. Nguyen, D. T. Quang, B. J. Park and J. Kim, *Microporous and Mesoporous Materials*, , DOI:10.1016/j.micromeso.2020.110746.
- 14 S. R. Caskey, A. G. Wong-Foy and A. J. Matzger, *J Am Chem Soc*, 2008, **130**, 10870–10871.
- 15 W. Kukulka, K. Cendrowski, B. Michalkiewicz and E. Mijowska, *RSC Adv*, 2019, **9**, 18527–18537.
- 16 W. Liang, C. J. Coghlan, F. Ragon, M. Rubio-Martinez, D. M. D’Alessandro and R. Babarao, *Dalton Transactions*, 2016, **45**, 4496–4500.
